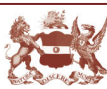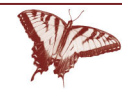

# Molecular phylogeny of the Valvatacea (Asteroidea: Echinodermata)

CHRISTOPHER MAH<sup>1\*</sup> and DAVID FOLTZ<sup>2</sup>

<sup>1</sup>Smithsonian Institution – Invertebrate Zoology, MRC-163, PO Box 37012 National Museum of Natural History Washington District of Columbia 20560, USA

<sup>2</sup>Louisiana State University – Biological Sciences, Baton Rouge, LA, 70803, USA

Received 28 January 2010; accepted for publication 2 February 2010

The Valvatacea is one of the most ecologically important, taxonomically diverse, and widespread groups of post-Palaeozoic (i.e. modern) Asteroidea. Classification within the group has been historically problematic. We present a comprehensively sampled, three-gene (12S, 16S, early-stage histone H3) molecular phylogenetic analysis of the Valvatacea. We include five of the six families within the Paxillosida, the monotypic Notomyotida, and 13 of the 16 families of the living Valvatida. The Solasteridae is removed from the Velatida (Spinulosacea) and joins the Ganeriidae and the Leilasteridae as members of the clade containing the Asterinidae. The Poraniidae is supported as the sister group to the large cluster of Valvatacea. Asteropseids and poraniids are phylogenetically distant, contrary to morphological evidence. Several goniasterid-like ophiasterids, such as *Fromia* and *Neoferdina* are supported as derived goniasterids rather than as Ophiasteridae. The Benthoplectinidae (Notomyotida) are supported as members of the Paxillosida as are two members of the Pseudarchasterinae that have traditionally been considered members of the Goniasteridae. Our data suggest that Antarctic valvataceans may be derived from sister taxa in adjacent regions.

© 2011 The Linnean Society of London, *Zoological Journal of the Linnean Society*, 2011, 161, 769–788.  
doi: 10.1111/j.1096-3642.2010.00659.x

ADDITIONAL KEYWORDS: Antarctica – Asterinidae – biogeography – classification – fossils – Goniasteridae – Ophiasteridae – Paxillosida – Solasteridae – tropics.

## INTRODUCTION

The Valvatacea (*sensu* Blake, 1987) is one of three superorders, in addition to the Forcipulatacea and the Spinulosacea, within the post-Palaeozoic Asteroidea. Valvataceans occur worldwide, especially in the tropical Indo-Pacific region (A.M. Clark & Rowe, 1971; Blake, 1990) where they are amongst the most frequently encountered and taxonomically diverse Asteroidea known.

The Valvatacea includes some of the most widely studied and ecologically important families of asterooids, including the Asterinidae, the Oreasteridae, the Goniasteridae, and the Ophiasteridae (all in the Valvatida) as well as the Astropectinidae and the

Luidiidae (in the Paxillosida). The Asterinidae (popularly known as bat stars or cushion stars) are studied in multiple fields, including developmental biology and larval biology (e.g. Byrne *et al.*, 2005; Byrne, 2006). Other families, such as the Oreasteridae and the Ophiasteridae, are commonly taken as tourist trinkets. These exploited species, especially oreasterids such as *Protoreaster*, have become a subject of concern by conservation biologists (e.g. Bos *et al.*, 2008; Scheibling & Metaxas, 2008). The Goniasteridae includes many taxa that have not been studied since their original description, but is the largest and most diverse family of living asterooids. However, some goniasterids, such as the cold-water *Hippasteria*, are known to be ecologically important as predators of cnidarians, including sea pens (Birke-land, 1974) and deep-sea corals (Krieger & Wing, 2002; Mah, Nizinski & Lundsten, 2010). Other

\*Corresponding author. E-mail: mahch@si.edu

members of the Valvatacea, such as the astropectinids and luidiids, are ecologically important members of benthic communities living in sandy and/or unconsolidated sediment habitats (e.g. McClintock & Lawrence, 1985; Hart, 2006), where they prey upon bivalves and other molluscs. Astropectinids and luidiids, along with other members of the Paxillosida, have also played an important role in the understanding of asteroid evolution (e.g. Wada, Komatsu & Satoh, 1996).

#### BACKGROUND: CLASSIFICATION OF THE ASTEROIDEA

Concepts of modern higher classification amongst living Asteroidea, particularly for nonforcipulate Asteroidea, began with Perrier (1884, 1894) and were later summarized and modified by Sladen (1889) and Fisher (1911). Perrier (1884) heavily emphasized pedicellariae as the diagnostic features for his four groups, the Forcipulatae, Spinulosae, Valvatae, and Paxillosae. Sladen (1889) developed a different classification that largely emphasized marginal plates and regrouped the higher classification into the Phanerozoia, which included several groups displaying prominent marginal plate series versus those in the Cryptozoia, which included those groups that displayed more inconspicuous marginal plate series. Sladen's perspectives were significantly modified by Fisher (1911) who established a broad division into three groups that is still largely used today in asteroid classifications. It was during this period that the discussions between Mortensen (1922, 1923) and MacBride (1921, 1923) took place, focusing on ancestral forms in asteroids, an issue that we will re-visit in our Discussion section. Spencer & Wright (1966) modified Fisher's (1911) classification by placing fossils alongside modern asteroid taxa. Their treatment was heavily influenced by the work of Fell (1962a, b) and his interpretation of the Luidiidae as recent survivors of the Palaeozoic, a perspective that was later contested by Blake (1972). Blake (1972) dismantled the Platyasterida and placed the Luidiidae in the Paxillosida.

Gale (1987b) and Blake (1987) both undertook extensive morphological cladistic analyses addressing higher-level classification of the Asteroidea. Both studies supported a post-Palaeozoic crown group clade of asteroids (Gale's Neoasteroidea), in spite of having substantial fundamental differences in tree topology, primarily regarding basal relationships amongst the Neoasteroidea. Several molecular analyses of asteroids have since been undertaken, including Lafay, Smith & Christen (1995), Wada *et al.* (1996), Knott & Wray (2000), Janies (2001), Matsubara, Komatsu & Wada (2004), and Matsubara *et al.* (2005). Tree topologies vary, but practically all of

these efforts reconstructed phylogenetic history from relatively few specimens as exemplars of the major lineages present within the Asteroidea.

Here, we present the most comprehensively sampled molecular phylogeny yet produced for the Valvatacea. Our goal is not to determine basal asteroid relationships, for which the presently available molecular data are probably inadequate (e.g. Smith *et al.*, 2004; Foltz *et al.*, 2007). Instead, we address the classification of prominent familial groups within this superorder (such as the Asterinidae and the Goniasteridae). These groups have particular importance to diverse fields in biology but are taxonomically complicated and have historically been difficult to classify.

## MATERIAL AND METHODS

### MOLECULAR METHODS

For the main analysis of Valvatacea shown in Figure 1, DNA extraction, PCR and sequencing were carried out as in Foltz *et al.* (2007) and Foltz & Mah (2009). Sequences (~355 bp of the mitochondrial 12S rDNA gene, ~625 bp of the 16S rDNA gene, and 327 bp of the nuclear early-stage histone H3 gene) were assembled and reconciled in SEQUENCHER 4.0. Each gene region was aligned separately in ClustalX (Thompson *et al.*, 1997). Conserved regions within each rDNA alignment were identified with the program GBlocks v. 0.91b (Castresana, 2000), using the following options: (1) minimum length of a conserved block was set to five nucleotides and (2) gaps were allowed provided they constituted less than half of the data per site, with further editing to remove priming sites and several poorly aligned regions. The data as analysed had 254 bp for the 12S gene, 503 bp for the 16S gene, and 327 bp for the histone H3 gene (1084 bp total). Concatenated sequences were submitted as a sequential PHYLIP file to the www.phylo.org server for analysis by RAxML (Stamatakis, 2006), with the following options specified: (1) bootstrapping with the number of replicates (150) determined automatically; (2) a mixed/partitioned model with each gene region treated separately; (3) per gene branch length optimization; and (4) the GTR + G substitution model, which is a general time-reversible nucleotide substitution model with gamma-distributed rate heterogeneity among sites. To permit our results to be compared with those of Waters, O'Loughlin & Roy (2004a, b) on the Asterinidae, we also amplified larger regions of the 12S and 16S rDNA genes in selected taxa. As this work relied mostly on extracting, amplifying, and sequencing mitochondrial DNA from preserved museum specimens (for technical details, see Foltz *et al.*, 2008), we used a combination of existing PCR primers and their complements (Wada *et al.*,

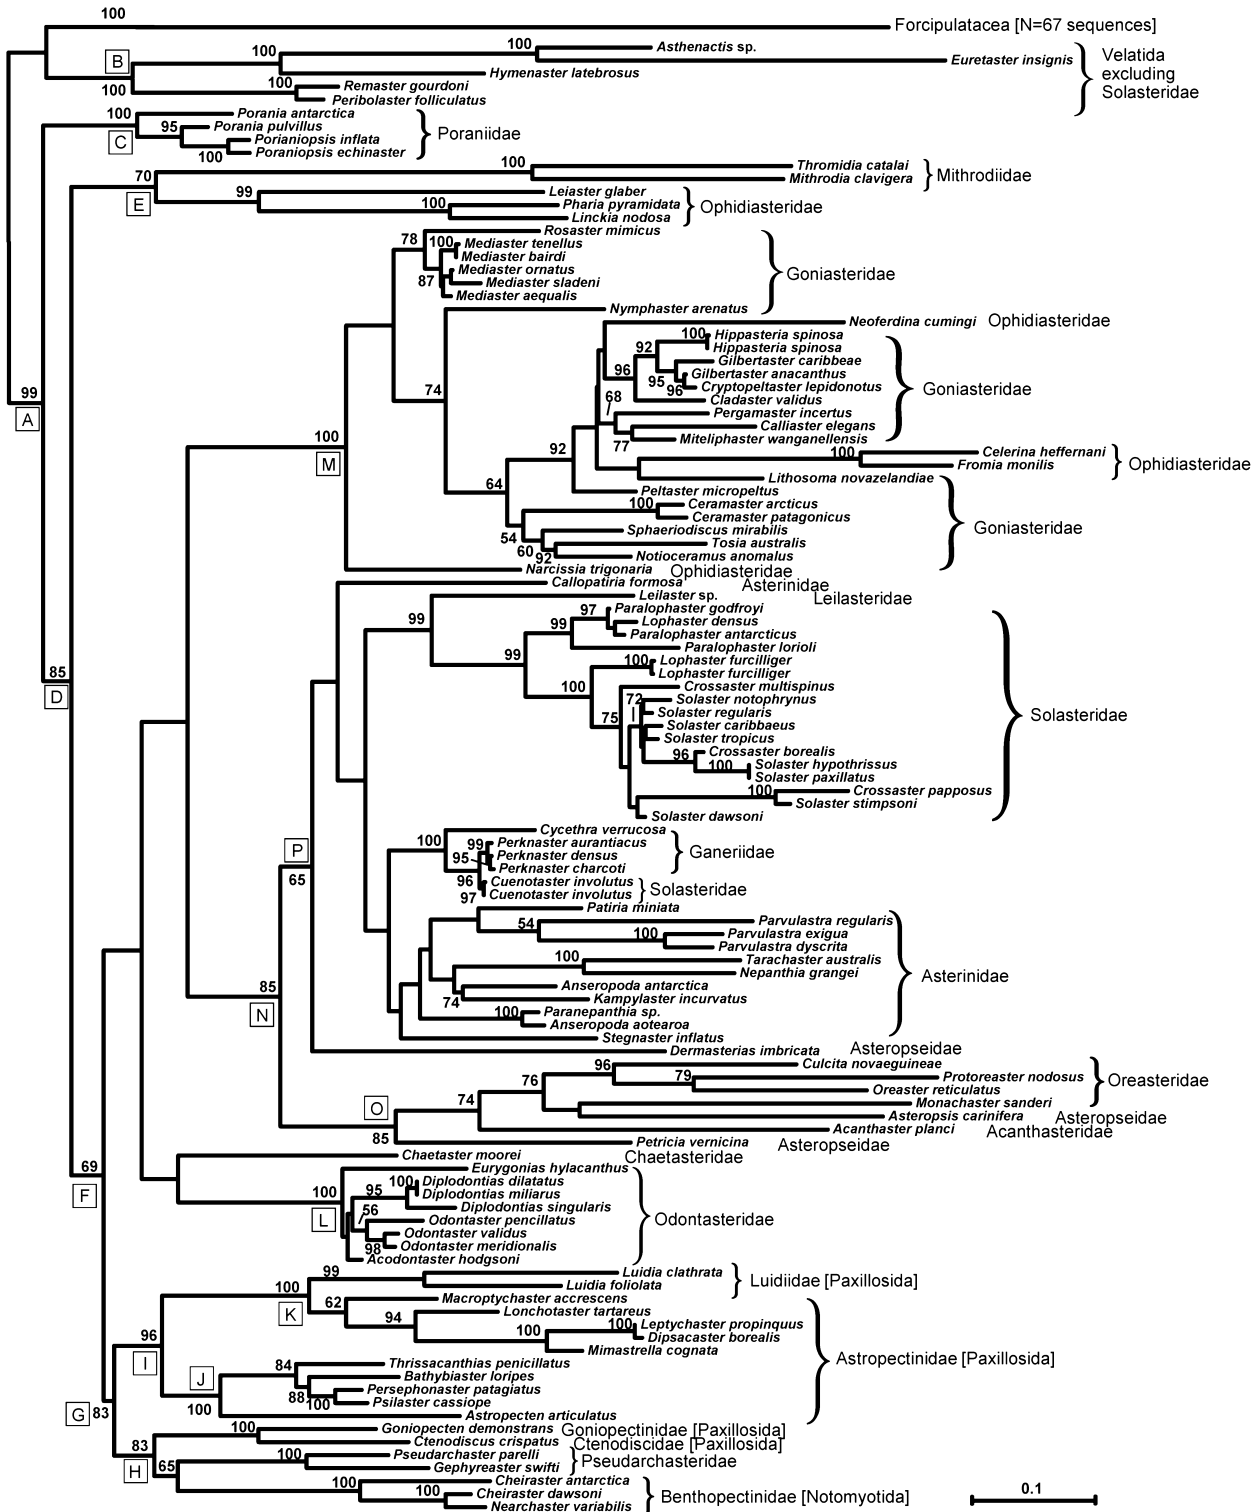

**Figure 1.** Maximum likelihood tree of valvatacean sea stars rooted against forcipulatacean + velatid sea stars. The analysis is based on 1084 bp of concatenated sequence data from two mitochondrial rDNA genes and one nuclear protein-coding gene, early-stage histone H3. As discussed in the text, solasterids are treated as part of the ingroup. The analysis was carried out in RAxML with bootstrap percentages indicated for nodes that had > 50% support. Boxed letters A–P are referred to in the text. Traditional family names are shown at the right; all families are in the Valvatida except as noted. The scale bar shows the expected number of substitutions.

1996; Waters *et al.*, 2004a,b, Foltz *et al.*, 2007) and two novel primers (see Appendix 2) that amplified the two rDNA genes in abutting pieces that ranged in size from 250–600 bp.

#### TAXON SELECTION

Difficulties in determining the root of the asteroid tree via outgroup rooting have been discussed and summarized by Foltz *et al.* (2007). Previous phylogenetic studies have variously put the Paxillosida, Valvatida, Spinulosida, or Forcipulatida closest to the root, when the tree was rooted against other echinoderm sequences. These varying results could be because of rate heterogeneity amongst genes or lineages, combined with differences amongst studies in taxon selection and the absence of a close sister group to the Asteroidea. In the present study, inclusion of sequences from some representative pterasterids (*Pteraster* and *Diplopteraster*) and echinasterids (e.g. *Henricia*) produced long terminal or subterminal branch lengths in preliminary analyses, and were excluded from the definitive analyses reported here. These long branches could reflect rate heterogeneity or (in the case of the histone H3 gene) possible gene conversion or amplification of a paralogous gene copy (Foltz & Mah, 2010). The most taxon-rich of earlier molecular phylogenetic analyses (Foltz *et al.*, 2007; C. Mah & D. Foltz, unpubl. data) have suggested that forcipulatacean sea stars (Forcipulatida + Brisingida), or possibly Forcipulatacea + Pterasteridae, are a monophyletic assemblage. A close relationship between the Forcipulatacea and Pterasteridae is also supported by presence/absence data for two ancient repeats in the ATP synthase,  $\beta$  subunit gene (Foltz, 2007). Additionally, phylogenetic analysis of a more slowly evolving paralogous copy of the histone H3 gene suggests a basal split between forcipulates and valvatids, when rooted on sea urchin sequences (no spinulosids, velatids, brisingids, paxillosids, or notomyotids were included in this analysis; Foltz & Mah, 2010). Therefore, in the present study valvatacean sequences ( $N = 89$  sequences representing 88 nominal species in the Notomyotida, Paxillosida, and Valvatida) were rooted on forcipulataceans ( $N = 67$  sequences) plus five velatidan sequences (from the Korethasteridae, Myxasteridae, and Pterasteridae). Matsubara *et al.* (2004) had previously suggested a close relationship between the Asterinidae and the Solasteridae, so we also included solasterid sequences ( $N = 19$  sequences representing 17 species) as part of the ingroup, even though solasterids are traditionally assigned to the Velatida. Details on all nonforcipulatacean taxa included in the analysis, such as GenBank accession numbers and specimen voucher numbers (where available), are in Appendix 1. Approximately

80% of the sequences in Appendix 1 were collected as part of the present study and are analysed here for the first time. Nearly all families traditionally assigned to the Valvatida, the Paxillosida, and the Notomyotida were sampled. This included, for the Valvatida, the Asterinidae, Asteropseidae, Chaetasteridae, Ganeridae, Goniasteridae (including the Pseudarchasterinae), Mithrodiidae, Odontasteridae, Ophidiasteridae, Oreasteridae, and the Poraniidae; for the Paxillosida, the Astropectinidae, Ctenodiscidae, and the Luidiidae; and for the Notomyotida, the Benthoplectinidae (all taxa follow the nominal classification of A.M. Clark, 1989, 1993, 1996). Higher level classification used herein is summarized in Table 1. Multiple genera were sampled from each family in order to represent better the morphological diversity of each group. Subfamily groupings, where present (e.g. the Hippasterinae in the Goniasteridae), were sampled to test their monophyly. We were able to comprehensively sample several families, including the monotypic Chaetasteridae and Ctenodiscidae plus both genera in the Mithrodiidae, and we were able to sample nearly completely the Odontasteridae and the Solasteridae. Some families, such as the Goniasteridae and the Asterinidae have a large number of genera and although sampling was adequate to test monophyly and show diversity, further in-depth sampling is needed.

Preliminary analyses with the three-gene data set suggested that taxa closely related to the asterinids included *Leilaster*, several solasterid genera (*Crossaster*, *Lophaster*, *Paralophaster*, and *Solaster*) traditionally included amongst the Velatida, *Acanthaster*, several oreasterids (*Culcita*, *Monachaster*, *Oreaster*, *Pentacaster*, and *Protoreaster*), and several asteropseids (*Asteropsis*, *Dermasterias*, and *Petricia*). Therefore, our analysis of the Asterinidae using an expanded rDNA sequence data set included one or more representatives of each of the above genera, as well as available asterinid sequences from GenBank (see Appendix 1 for details). The mitochondrial-only rDNA data set was also curated with the program GBlocks and analysed by RAxML, using the same settings as for the three-gene data set. The mitochondrial-only analysis included 732 bp of the 12S rDNA gene and 685 bp of the 16S rDNA gene.

## RESULTS

### CLADE GROUPINGS AND SUPPORT

Basal support for the three-gene tree (Fig. 1) rooted against forcipulatacean + velatidan sea stars is strong (node A, bootstrap support = 99%) and upholds a dichotomy between velatidan taxa minus the Solasteridae (i.e. *Hymenaster*, *Euretaster*, *Asthenactis*,



**Table 1.** Existing classification of Valvatacea *sensu* Blake (1987) and A.M. Clark (1993)

---

|                                                                                                                                                                                                                                                                                                                                                                             |
|-----------------------------------------------------------------------------------------------------------------------------------------------------------------------------------------------------------------------------------------------------------------------------------------------------------------------------------------------------------------------------|
| Valvatacea                                                                                                                                                                                                                                                                                                                                                                  |
| Notomyotida                                                                                                                                                                                                                                                                                                                                                                 |
| Benthopectinidae: <i>Cheiraster</i> , <i>Nearchaster</i>                                                                                                                                                                                                                                                                                                                    |
| Paxillosida                                                                                                                                                                                                                                                                                                                                                                 |
| Astropectinidae: <i>Astropecten</i> , <i>Bathybiaster</i> , <i>Dipsacaster</i> , <i>Leptychaster</i> , <i>Lonchotaster</i> , <i>Macroptychaster</i> , <i>Mimastrella</i> , <i>Persephonaster</i> , <i>Psilaster</i> , <i>Thrissacanthias</i>                                                                                                                                |
| Ctenodiscidae: <i>Ctenodiscus</i>                                                                                                                                                                                                                                                                                                                                           |
| Goniopectinidae: <i>Goniopecten</i>                                                                                                                                                                                                                                                                                                                                         |
| Luidiidae: <i>Luidia</i>                                                                                                                                                                                                                                                                                                                                                    |
| Porcellanasteridae (NS)                                                                                                                                                                                                                                                                                                                                                     |
| Radiasteridae (NS)                                                                                                                                                                                                                                                                                                                                                          |
| Valvatida                                                                                                                                                                                                                                                                                                                                                                   |
| Incertae sedis- <i>Leilaster</i> (Leilasteridae)                                                                                                                                                                                                                                                                                                                            |
| Archasteridae (NS)                                                                                                                                                                                                                                                                                                                                                          |
| Asterinidae: <i>Anseropoda</i> , <i>Aquilonastra</i> , <i>Asterina</i> , <i>Callopatiria</i> , <i>Kampylaster</i> , <i>Meridiastra</i> , <i>Nepanthia</i> , <i>Paranepanthia</i> , <i>Parvulastra</i> , <i>Patiria</i> , <i>Patiriella</i> , <i>Stegnaster</i> , <i>Tremaster</i>                                                                                           |
| Acanthasteridae: <i>Acanthaster</i>                                                                                                                                                                                                                                                                                                                                         |
| Asterodiscididae (NS)                                                                                                                                                                                                                                                                                                                                                       |
| Astropseidae: <i>Asteropsis</i> , <i>Dermasterias</i> , <i>Petricia</i>                                                                                                                                                                                                                                                                                                     |
| Chaetasteridae: <i>Chaetaster</i>                                                                                                                                                                                                                                                                                                                                           |
| Ganeriidae: <i>Cycethra</i> , <i>Perknaster</i> , <i>Tarachaster</i>                                                                                                                                                                                                                                                                                                        |
| Goniasteridae: <i>Calliaster</i> , <i>Ceramaster</i> , <i>Cladaster</i> , <i>Cryptopeltaster</i> , <i>Gephyreaster</i> , <i>Hippasteria</i> , <i>Lithosoma</i> , <i>Mediaster</i> , <i>Mittelphaster</i> , <i>Notioceramus</i> , <i>Nymphaster</i> , <i>Peltaster</i> , <i>Pergamaster</i> , <i>Pseudarchaster</i> , <i>Rosaster</i> , <i>Sphaeriodiscus</i> , <i>Tosia</i> |
| Mithrodiidae: <i>Mithrodia</i> , <i>Thromidia</i>                                                                                                                                                                                                                                                                                                                           |
| Odontasteridae: <i>Acodontaster</i> , <i>Diplodontias</i> , <i>Eurygonias</i> , <i>Odontaster</i>                                                                                                                                                                                                                                                                           |
| Ophidiasteridae: <i>Celerina</i> , <i>Fromia</i> , <i>Leiaster</i> , <i>Linckia</i> , <i>Narcissia</i> , <i>Neoferdina</i> , <i>Pharia</i>                                                                                                                                                                                                                                  |
| Oreasteridae: <i>Culcita</i> , <i>Monachaster</i> , <i>Oreaster</i> , <i>Pentacaster</i> , <i>Protoreaster</i>                                                                                                                                                                                                                                                              |
| Podosphaerasteridae: <i>Podosphaeraster</i>                                                                                                                                                                                                                                                                                                                                 |
| Poraniidae: <i>Porania</i> , <i>Poraniopsis</i>                                                                                                                                                                                                                                                                                                                             |
| Spinulosacea                                                                                                                                                                                                                                                                                                                                                                |
| Velatida                                                                                                                                                                                                                                                                                                                                                                    |
| Korethrasteridae: <i>Peribolaster</i> , <i>Remaster</i>                                                                                                                                                                                                                                                                                                                     |
| Myxasteridae: <i>Asthenactis</i>                                                                                                                                                                                                                                                                                                                                            |
| Pterasteridae: <i>Euretaster</i> , <i>Hymenaster</i>                                                                                                                                                                                                                                                                                                                        |
| Solasteridae: <i>Crossaster</i> , <i>Cuenotaster</i> , <i>Lophaster</i> , <i>Paralophaster</i> , <i>Solaster</i>                                                                                                                                                                                                                                                            |

---

NS, not sampled.

*Remaster*, *Peribolaster*; node B, bootstrap support = 100%) + Forcipulatacea as the sister clade to the larger ingroup Valvatacea + Solasteridae. Basal dichotomy for the Valvatacea + Solasteridae supports a separation between poraniid genera (*Porania*, *Poraniopsis*; node C, with bootstrap support = 100%) and the remaining valvatacean taxa (node D, bootstrap support = 85%). The nonporaniid valvatacean clade includes members of the Paxillosida, the Notomyotida, the Valvatida, and the Solasteridae and is split basally into a smaller clade (node E, bootstrap support = 70%) and a more taxon-rich clade (node F, bootstrap support = 69%). The clade subtended by node E includes several ophiasterids (*Leilaster*, *Linckia*, and *Pharia*; bootstrap support = 99–100%) as sister taxa to the Mithrodiidae (*Mithrodia* and *Thro-*

*midia*; bootstrap support = 100%). The clade subtended by node F includes taxa that closely correspond to the historical Valvatida + Paxillosida + Notomyotida, as well as several members of the order Velatida (Solasteridae). This clade is separated into two clusters. The smaller clade (node G, bootstrap support = 83%) is further split into (1) a clade composed of representatives of three orders (the Benthopectinidae, Goniopectinidae, and Pseudarchasterinae; node H, bootstrap support = 83%) that are reciprocally monophyletic with 100% bootstrap support and (2) a larger, primary 'Paxillosida' clade (node I, bootstrap support = 96%) that includes genera which have all been previously assigned to the Paxillosida. This larger 'Paxillosida' clade contains multiple taxa from the Astropectinidae and the Luidiidae.

*Astropecten* is supported as the sister clade to *Thrissacanthias* + [*Bathybiaster* + (*Persephonaster* + *Psilaster*)] with 100% bootstrap support (node J). The latter four genera are also highly supported by 84–100% bootstrap values. The remaining ‘Paxillosida’ clade (node K, bootstrap support = 100%) has a basal dichotomy with *Luidia* (bootstrap support = 99%) as the sister clade to a lineage that has *Macroptychaster* (bootstrap support = 62%) as sister to a clade containing *Lonchotaster*, *Mimastrella*, *Dipsacaster*, and *Leptychaster* (all supported with bootstrap values between 94 and 100%).

Figure 1 shows the remaining ‘Valvatida’ clade including (1) the Odontasteridae (node L, bootstrap support = 100%); (2) *Chaetaster* (Chaetasteridae); (3) a smaller cluster that is largely consistent with the Goniasteridae + some Ophidiasteridae (node M, bootstrap support = 100%); and (4) a larger cluster (node N, bootstrap support = 85%) that includes members from the Acanthasteridae, Asterinidae, Asteropseidae, Ganeriidae, Oreasteridae, and the Solasteridae. A well-supported subclade (node O, bootstrap support = 85%) includes several oreasterid genera (*Culcita*, *Protoreaster*, *Oreaster*, *Monachaster*) and two asteropseids (*Petricia* and *Asteropsis*). A moderately supported subclade (node P, bootstrap support = 65%) is composed primarily of solasterids + asterinids along with two ganeriid genera, the enigmatic *Leilaster* (Leilasteridae) and the asteropseid *Dermasterias*.

The mitochondrial-only tree (Fig. 2) included more taxa and more total sequence length (1417 vs. 1084) than the three-gene tree. Unlike the three-gene tree, the two-gene tree recovered a monophyletic Asterinidae + Solasteridae + Ganeriidae + Leilasteridae with moderate support (bootstrap support = 70%, node 1 in Fig. 2). Basal relationships within the Asterinidae were mostly unresolved, but some taxon-rich clades were well supported (bootstrap support = 100%), including the Solasteridae (exclusive of *Cuenotaster*), the Ganeriidae (including *Cuenotaster*) and *Paranepanthia* + *Anseropoda aotearoa*. Three genera (*Anseropoda*, *Crossaster*, and *Lophaster*) were each reconstructed as polyphyletic.

## DISCUSSION

### COMPARISONS: HIGHER LEVEL CLASSIFICATION, PHYLOGENY, AND FOSSILS

Our results, when considered in conjunction with the known fossil record for valvatacean asteroids, support a hypothesis of early, rapid diversification within the Asterozoa. Both mid-point rooting and molecular clock analyses (details not shown) support the root at node A in our main tree (Fig. 1). Alternative rootings at nodes C–G would not change the conclusions below

about the relationships amongst valvatidan families or amongst paxillosidan families. Alternative rootings would, however, give a different picture of basal differentiation amongst the extant Asterozoa. Figure 1 suggests an early and fairly rapid diversification of forcipulatacean, velatid, poraniid, mithrodiid, and valvatacean lineages. The short internodes separating these groups, plus the relatively long terminal and subterminal branches in some clades (e.g. Mithrodiidae), emphasize again the need for additional taxon sampling of problematic groups and for more slowly evolving nuclear protein-coding sequences, to resolve basal asteroid relationships (Smith *et al.*, 2004). Although the histone H3 gene is a classic example of amino acid sequence conservation at deep phylogenetic levels (e.g. Malik & Henikoff, 2003), it actually shows a rate of substitution at synonymous sites that is roughly comparable to the more conserved and readily alignable regions of the mitochondrial 12S and 16S rDNA genes (D. Foltz, unpubl. data). As shown in Figure 1, these relatively fast-evolving sequences (H3, 12S, and 16S) can usually resolve relationships at the genus and family level, but do not always resolve relationships amongst families and orders. Given the proposed root in Figure 1, the taxonomic composition and relationships amongst taxa are similar to the phylogenetic concept and classification of the Valvatacea as proposed by Blake (1987). Blake’s (1987) Valvatacea included the Paxillosida + Notomyotida as part of a sister clade to the Valvatida. However, the Solasteridae – which was included in the Velatida (Spinulosacea) in Blake’s (1987) tree and in the Spinulosa by Fisher’s (1911) classification – is included as part of the Valvatacea in Figure 1. The tree also shows similarities to the phylogenetic affinities proposed by Blake, Tintori & Hagdorn (2000) who supported *Solaster* as a sister clade to *Asterina* (Asterinidae) and *Cycethra* (Ganeriidae) as well as a Paxillosida + Notomyotida relationship.

The earliest molecular phylogenetic treatment for valvatacean taxa was that of Lafay *et al.* (1995). Although their study had limited molecular data (400 bp of 28S ribosomal sequence) and taxon sampling, their maximum-likelihood topology did show some similarities to relationships in Figure 1 (e.g. *Asterina* as the sister group to *Crossaster* plus *Henricia* and *Echinaster*). Wada *et al.*’s (1996) topology also recovered asterinids as the sister group to *Crossaster*, but otherwise had little similarity to the tree in Figure 1. Knott & Wray (2000) used cytochrome *c* oxidase subunit 1 (COI) and tRNA sequences and included a more diverse taxon sampling for the Valvatida and the broader Valvatacea. Although taxonomic sampling was incomplete, and monophyly/phylogenetic placement of several taxa was inconsistent, Knott and Wray also showed support for the

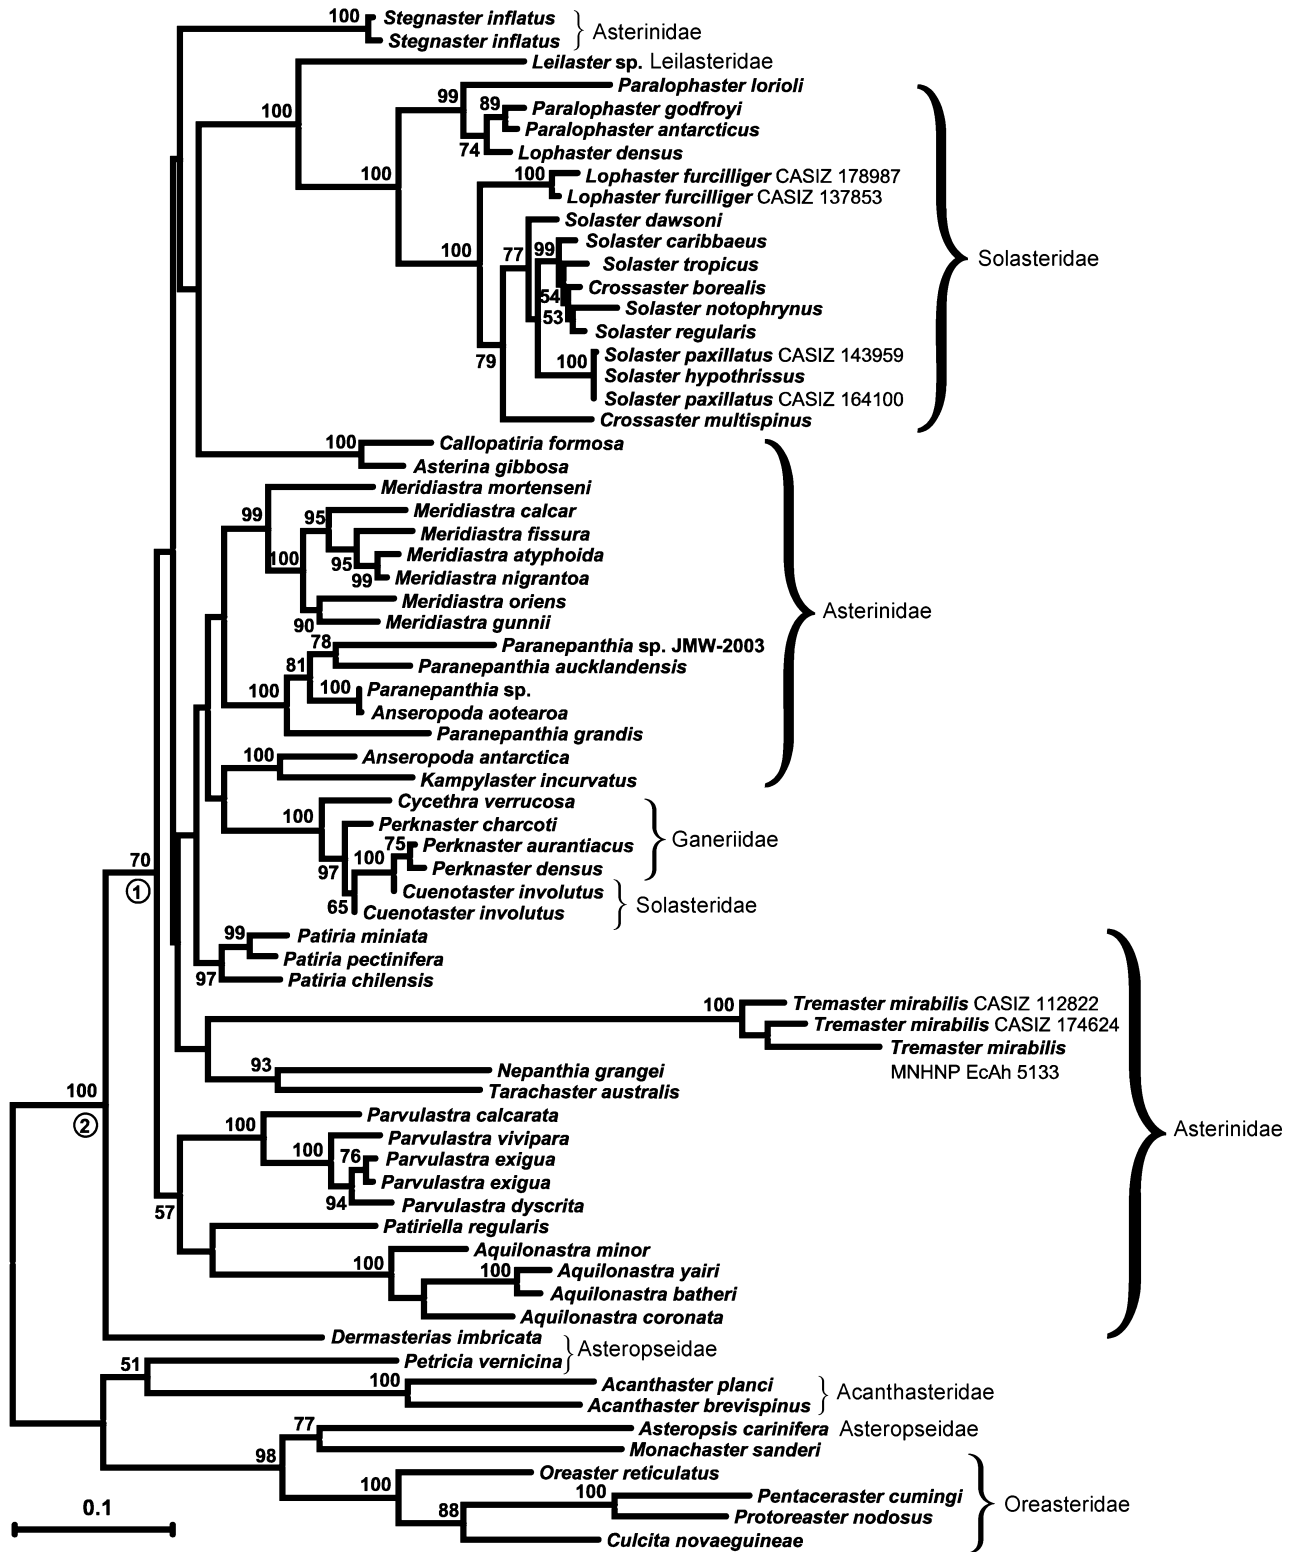

**Figure 2.** Maximum likelihood tree of asterinid + solasterid sea stars rooted against closely related valvateid sea stars. The analysis is based on 1417 bp of concatenated sequence data from two mitochondrial rDNA genes. Circled numbers 1 and 2 are referred to in the text. Other details as in Figure 1.

Paxillosida + Valvatida (Valvatacea) grouping. The total evidence tree of Janies (2001) included several putative valvatidan taxa but included no consistently monophyletic groupings within the Asteroidea. Matsubara *et al.* (2004) showed a sister group relationship between asterinid and solasterid taxa based on nuclear 18S rDNA plus mitochondrial 12S and 16S rDNA data. Their trees included several valvatidan taxa, but aside from the asterinid + solasterid clade and other secondary sister-taxon relationships, basal relationships were poorly resolved. Matsubara *et al.* (2005) analysed complete mtDNA nucleotide sequences for two paxillosidans (*Luidia* and *Astropecten*), a valvatidan (*Asterina*), and two forcipulatidans (*Asterias* and *Pisaster*). Based on their tree, they concluded that paxillosidan characters were secondarily derived, but their tree showed different relationships to those in Figure 1 (e.g. asterinids and paxillosidans do not share a similarly close relationship in our analysis). A recent COI molecular phylogeny of the Asteroidea (Yasuda *et al.*, 2006) rooted against two sea urchins showed a tree topology composed almost entirely of valvataceans that was consistent with relationships presented in Figure 1.

Valvatacean fossil occurrences are consistent with the phylogenetic trees presented herein (Figs 1, 2) and are further suggestive of (or at least do not contradict) a hypothesis for early Mesozoic diversification in asteroids. Phylogenetic hypotheses developed by Blake (1987) and Gale (1987b) suggest post-Palaeozoic asteroid lineages and imply early Mesozoic diversification. Where fossils were known to occur, they were compared with ingroup taxa that had similar or shared morphological synapomorphies. Groups that are not discussed below either lack information on fossil occurrence or have uncertain or unhelpful fossil occurrence (e.g. the Ophidiasteridae or the Leilasteridae).

#### THE VELATIDA (REVISED)

Although a survey of the outgroup was not a primary objective of this study and taxon sampling for the group is incomplete, our data did present some insight into the relationships amongst velatidan taxa, which were distanced from the other large nominal velatidan group, the Solasteridae. *Remaster* and *Peribolaster* were supported as sister taxa, which is consistent with their placement within the Korethasteridae. The placement of *Asthenactis* (Myxasteridae) and the two pterasterids, *Euretaster* and *Hymenaster* on the same clade, is broadly consistent with relationships outlined by Blake (1987) but disagrees with the phylogeny of Villier *et al.* (2004).

Villier *et al.* (2009) characterized several Jurassic members of the Velatida, including the Paleobentho-

pectininae and described a Jurassic multi-armed velatidan, *Deacuminaster*, which suggested relationship with the Myxasteridae. Villier *et al.* (2004) established pterasterid fossils remains from the Late Cretaceous and placed them within a morphology-based phylogeny for the Pterasteridae. Consideration of the Velatida as sister group to the Valvatida is not contradicted by fossil occurrence.

#### THE PORANIIDAE

The basal phylogenetic position of the Poraniidae relative to the larger cluster of valvataceans is consistent with Blake (1987), who separated the Poraniidae from the Asteropeidae. This is a position contrary to the perspective of traditional revisions, which have often treated the two families as closely linked to one another (e.g. Hotchkiss & Clark, 1976, A.M. Clark, 1984; Gale, 1987a). The thickened dermal tissue present on members from both groups has led to several studies supporting the two groups as closely related (e.g. A.M. Clark, 1984; Gale, 1987b; Blake *et al.*, 2000). Our results are consistent with the notion of Blake *et al.* (2000), who discussed the possibility that the thickened dermal tissue in the Poraniidae and the Asteropeidae were subject to homeomorphy, which would explain the difficulty in correctly placing these taxa within a classification.

The Poraniidae is represented by two early Mesozoic fossils, the Triassic *Noriaster barberoi*, described from northern Italy by Blake *et al.* (2000) and the Middle Jurassic *Sphaeraster jurassicus*, described by Hess (1972). *Noriaster* is supported in Blake *et al.* (2000) as phylogenetically similar to *Porania*, suggesting a possible time frame for diversification of the Valvatacea on the tree. The Triassic represents a potentially important period for recognizing diversification in the Asteroidea early in the Mesozoic and the basal location of the Poraniidae does not disagree with Triassic fossil occurrence for the group.

#### THE ODONTASTERIDAE AND THE CHAETASTERIDAE

Prior treatments (e.g. Fisher, 1911) have supported the Odontasteridae as having close affinities with the Goniasteridae. This notion has been supported by morphology-based phylogenies (Blake, 1987; Gale, 1987b) and by our molecular data (Fig. 1). The position of the monotypic Chaetasteridae in Blake's (1987) phylogeny is also consistent with the relatively stemward position of this taxon relative to the Odontasteridae and other valvatidans in Figure 1.

Fell (1954) described a Jurassic occurrence of *Odontaster* from South Auckland, New Zealand, which would be consistent with its relatively stemward phylogenetic position. The fossil shares recognizable



features (e.g. Fell's first ambulacral) with other odontasterids. Fell (1954) was confident in assigning the specimen to *Odontaster* but pending a full assessment of the Odontasteridae, it is unclear how reliable this character is for correct taxonomic assignment.

A single early Cretaceous member of the Chaetasteridae, *Chaetasterina gracilis*, was described by Hess (1970), which he postulated was intermediate between the Radiasteridae and the Ganeriidae (as represented by *Hyalinothrix*). However, *Chaetaster* was supported as sister taxon to *Odontaster* and was not supported on either of the clades containing radiasterid or ganeriid taxa (Fig. 1).

#### THE ASTERINIDAE, GANERIIDAE, AND SOLASTERIDAE

The Asterinidae has occupied a controversial position in the history of asteroid classification, having been placed in Spinulosida in Fisher (1911) and others (e.g. Sladen, 1889) but later independently reassigned to the Valvatida by Blake (1987) and Gale (1987b). Classification and revision within the Asterinidae has been a constant source of activity (e.g. A.M. Clark, 1983; O'Loughlin & Waters, 2004), but the distinctive morphology of asterinids has generally suggested a derived and potentially monophyletic assemblage with only limited subdivision (e.g. the Tremasterinae Sladen, 1889; Anseropodinae Fisher, 1906; summary in Spencer & Wright, 1966). Waters *et al.* (2004a) provided the first molecular phylogenetic treatment of the Asterinidae that included taxa beyond *Asterina + Patiriella*, using mitochondrial COI, 12S, and 16S rRNA data, primarily from Australasian taxa. Their phylogenetic tree did not support monophyly for the Asterinidae, but was the basis for subsequent far-reaching taxonomic revisions (O'Loughlin & Waters, 2004).

Basal relationships in the large clade subtended by node P in Figure 1 were mostly unresolved. Somewhat better resolution was obtained in the two-gene tree (Fig. 2) for some groups, such as *Parvulastra* and *Kampylaster + Anseropoda antarctica*. However, support for all basal nodes in the asterinid clade of our two-gene tree (i.e. those subtended by node 1 in Figure 2) was also relatively poor (< 50%), suggesting that basal relationships within this group will require further study. However, when placed into the context of greater taxonomic sampling, our phylogenetic results mirror the results of Waters *et al.* (2004a) and cast substantial doubt on the monophyly of the Asterinidae. This strongly suggests that the Asterinidae, as traditionally defined, is a paraphyletic assemblage. The stemward positions on node P of all the asterinid taxa suggest that they occupy a relatively plesiomorphic condition, forming more of a grade relative to more derived taxa, such as the solasterids and the

ganeriids. This represents a significant shift in perception of the Asterinidae, which has historically been supported by distinct morphological autapomorphies and has been perceived more as a derived, terminal branch (e.g. Blake, 1987; Gale, 1987b) rather than as an ancestral grouping.

Several of the other phylogenetic and taxonomic results produced by Waters, O'Loughlin & Roy (2004a) and O'Loughlin & Waters (2004), especially the monophyly of the higher branches, such as *Meridiastra*, *Patiria*, *Paranepanthia*, *Aquilonastra*, and *Parvulastra*, are upheld by our results. The basal branches in Waters, O'Loughlin & Roy (2004a) are clarified in our results. *Dermasterias*, which was shown embedded within the ingroup Asterinidae, is clearly removed from the Asterinidae by our trees. Our exemplar species of *Nepanthia*, *Nepanthia grangei*, differs from that of Waters, O'Loughlin & Roy (2004a) who used *Nepanthia troughtoni* but our result shows *Nepanthia* as the sister to the ganeriid *Tarachaster australis*.

*Tremaster* has traditionally been placed in the Asterinidae but has been separated by some workers (e.g. Sladen, 1889; Smith & Tranter, 1985) into the Tremasterinae, which included *Tremaster*, *Stegnaster*, and two fossil tremasterines (Spencer & Wright, 1966). Jangoux (1982) disagreed with this classification and removed *Stegnaster* from the Tremasterinae, a conclusion that is consistent with our mitochondrial-only tree (Fig. 2). Available data support *Tremaster* as a divergent lineage within the Asterinidae with uncertain affinities.

Derived members of the 'asterinid' clade include primarily former members of the Solasteridae and the Ganeriidae, plus the Leilasteridae. The solasterid + asterinid relationship, as supported by molecular data, was first observed by Wada, Komatsu & Satoh (1996) and later developed by Matsubara *et al.* (2004). The presence of ganeriid taxa, such as *Cycethra* and *Perknaster*, within the asterinid clade is consistent with historical classifications that have demonstrated affinities between asterinids and ganeriids. The Ganeriidae have always been supported as similar to or morphologically close to the Asterinidae. Early classifications (e.g. Sladen, 1889) included *Cycethra* and *Ganeria* as members of the Ganeriinae, part of a subfamily within the Asterinidae. This affinity has been further supported by contemporary morphology-based phylogenies (Blake, 1987; Gale, 1987b). Further sampling will be necessary to test the monophyly and affinities of the Ganeriidae.

The Solasteridae, *sensu* A. M. Clark (1996) was largely supported as monophyletic with the sole exception of the Antarctic *Cuenotaster involutus*, which was included as the sister clade to the ganeriid *Perknaster*. Although much work remains to be completed regarding this question, some morphological

characters are consistent with *Cuenotaster* as a member of the Ganeriidae.

Jurassic fossils are known for taxa within the clade subtended by node P (Solasteridae + Asterinidae + Ganeriidae + Leilasteridae) but are limited to the Asterinidae and the Solasteridae. Asterinid fossils are limited to those showing affinities with *Tremaster* in the subfamily Tremasterinae.

*Tremaster* is supported on a long branch as sister group to a clade containing *Nepanthia* and *Tar-chaster* (Fig. 2). Tremasterine fossils, such as *Mesotremaster felli* Hess, 1972 and *Mesotremaster zbindeni* Hess, 1981 from Germany and *Protremaster uniserialis* Smith & Tranter, 1985 from Antarctica have been collected from Jurassic strata. Nontremasterine asterinid fossils are unknown.

*Plesiosolaster* (described as *Brachisolaster*) *moretonis* was re-described and discussed by Blake (1993) and further discussed by Villier, Charbonnier & Bernard (2009) from the Jurassic of England and is the only well-preserved fossil solasterid known. Although a full phylogenetic analysis was not undertaken, Blake hypothesized that the multiarmed condition for solasterids was derived relative to a more ancestral *Lophaster* or *Rhipidaster*-like morphology. Blake's hypothesis is consistent with our phylogenetic tree (Figure 1). This may imply that the lineage containing multiarmed taxa (*Solaster* and *Crossaster*) may be closely associated with the Jurassic occurrence of multiple arms in the Solasteridae.

#### THE OREASTERIDAE, ACANTHASTERIDAE, AND ASTEROPSEIDAE

Although still supported as a member of the Valvatida and/or Valvatacea in Figure 1, the oreasterid/asteropseid lineage has historically been considered as most closely related to either the Goniasteridae and/or the Ophidiasteridae. The close relationship between the oreasterids and asteropseids (node O in Fig. 1) agrees with Blake (1987) and Gale (1987b), but our topology agrees more closely with the tree of Blake (1987) in that it supports poraniids as a lineage separate from asteropseids. Gale (1987b) considered asteropseids as members of the same lineage as poraniids.

The Asteropseidae was not supported as monophyletic, supporting *Asteropsis*, *Dermasterias*, and *Petricia* on different lineages. *Asteropsis* most closely resembles the tree topology presented by Blake (1987) in that it is supported as sister taxon to the goniasterid-like oreasterid *Monachaster* on the sister clade to the large primary Oreasteridae (*Culcita*, *Oreaster*, etc.). *Petricia* was supported as the sister taxon to *Acanthaster*. *Dermasterias* was supported as the sister taxon to the Asterinidae + Solasteridae +

Ganeriidae + Leilasteridae in the three-gene tree (node P in Fig. 1) with moderate bootstrap support (65%). Although we used the relationships in Figure 1 as the basis of rooting the asterinid tree in Figure 2, placing the root at the branch subtending node 2 rather than at node 1 would still leave the asterinid tree monophyletic and would group *Dermasterias* with the remaining members of the asteropseid/oreasterid clade, which is more consistent with prior classifications (e.g. Hotchkiss & Clark, 1976).

*Acanthaster* is supported as the sister group to the included oreasterids, which is consistent with the close relationship between the Acanthasteridae and the Oreasteridae as supported by Blake (1979, 1987) based on skeletal evidence. In our tree, the (Oreasteridae + Asteropseidae) + Acanthasteridae/Asteropseidae clade is supported (node N in Fig. 1) as the sister clade to the large Asterinidae + Ganeriidae + Leilasteridae + Solasteridae + *Dermasterias* clade, which is a substantial departure from prior phylogenetic hypotheses.

The presence of *Acanthaster* as the sister taxon to the Oreasteridae + *Asteropsis* is consistent with the morphological evidence and phylogenetic hypothesis of Blake (1979, 1987). He documented an Eocene oreasterid (Blake, 1979) that was close to *Anthenea* or *Goniodiscaster* and showed a morphology demonstrating characters consistent with *Acanthaster* and other Oreasteridae. Thus, oreasterid fossil occurrence can be shown to be present in the Eocene. Otherwise, there are relatively few oreasterid fossils known and most are either too poorly known or too incomplete to be useful here.

#### THE GONIASTERIDAE

The Goniasteridae + four ophidiasterid genera are supported as monophyletic (node M in Fig. 1), consistent with historical definitions such as those outlined in A.M. Clark (1993) and Mah (2009). Several affinities between goniasterid genera are supported by our data, including between *Calliaster* and *Milteliphaster*, as suspected by Aziz & Jangoux (1985), and between *Mediaster* and *Rosaster*, as suggested by Fisher (1919).

Our data also support the monophyly of the cold-water corallivorous Hippasterinae as reviewed by Fisher (1911) and later by Mah *et al.* (2010). Fisher (1906) perceived affinities between *Gilbertaster* and the Hippasterinae, which were later confirmed by Mah *et al.* (2010). This subfamily originally included *Hippasteria*, *Cryptopeltaster*, and the distantly related *Cladaster*. *Cladaster* forms the sister group to the Hippasterinae in Figure 1, which may or may not agree with the relationship hypothesized by Mah (2006) and Mah *et al.* (2010) depending on subsequent taxonomic sampling.

The most substantial difference from previous definitions in the Goniasteridae in Figure 1 is the inclusion of several goniasterid-like ophidiasterids, including *Fromia* + *Celerina* (which may be synonyms), and *Neoferdina*. This result supports a nonmonophyletic Ophidiasteridae and suggests that other unsampled goniasterid-like taxa, such as *Dissogenes*, *Paraferdina*, *Ferdina*, and *Bunaster* may also be correctly placed within the Goniasteridae. The particularly goniasterid-like appearance of *Dissogenes* has been discussed by Fisher (1919) and Jangoux (1981) as intermediate between ophidiasterids and goniasterids. *Narcissia trigonaria* is supported in an unusual position as the sister clade to the larger, diverse members of clade M, which removes it from both the historical Ophidiasteridae, as well as the 'ophidiasterid-like goniasterid' condition observed in *Fromia* and *Neoferdina*. However, the 100% bootstrap support for clade M, which includes *Narcissia*, strongly implies that it is not supported with the traditional Ophidiasteridae.

Our results show asterinids in a phylogenetic position that is similar to prior groupings established by morphological phylogenies. Blake (1987) showed asterinids, ganeriids, and poraniids as sister taxa to a large and diverse clade including goniasterids, ophidiasterids, and oreasterids, amongst others. Gale (1987b) included the asterinids (and ganeriids) as part of a polytomy with goniasterids and odontasterids. Aside from *Pseudarchaster* (which is discussed below) only one molecular phylogeny has included goniasterids in their taxonomic coverage. Knott & Wray (2000) included *Mediaster*, *Hippasteria*, and *Ceramaster* and although they were supported on a clade with other valvataceans, they did not cluster together.

Amongst modern Asteroidea, the Goniasteridae are perhaps the best observed in the fossil record, having a particularly rich diversity of fossil taxa in the Cretaceous of northern Europe (e.g. Breton, 1992). Jurassic Goniasteridae do occur (e.g. Breton, 1992) but several taxa are based on incomplete material and/or are similar to pseudarchasterines, which are supported with the Paxillosida in our treatment. *Nymphaster*, which occurs close to the basal dichotomy of the goniasterid lineage, occurs primarily in Cretaceous strata (Gale, 1987a; Breton, 1992). Stemward amongst the Goniasteridae is *Mediaster*, which is represented by *Mediaster hayi* Blake 1986 from the Cretaceous of California. Other included genera with Cretaceous fossil occurrence include *Hippasteria* (Fell, 1956) and *Cladaster* (Medina & Del-Valle, 1983).

Although *Tosia* was not explicitly dated, the pentagonasterine phylogeny presented by Mah (2007) suggested that phylogenetic events in the

*Tosia* + *Pentagonaster* lineage were probably close to the Eocene/Oligocene climate shift associated with the isolation of Antarctica from Australia. This relatively younger *Tosia* + *Pentagonaster* lineage would be consistent with its relatively derived phylogenetic position and its relatively close relationship with the Antarctic *Notioceramus*. Molecular data supporting the presence of several goniasterid-like ophidiasterids amongst the Goniasteridae also shift the interpretation of goniasterid-like ophidiasterid fossils. Blake & Reid (1998) described two such taxa, *Denebia* and *Altairia*, from the Cretaceous of Texas.

#### THE OPHIDIASTERIDAE AND MITHRODIIDAE

The sister group relationship between several ophidiasterids and the Mithrodiidae, as supported by Blake (1987), is confirmed by our data. The nonmonophyly of the Ophidiasteridae is consistent with morphological breaks in identification keys and classifications (e.g. H.L. Clark, 1946) that separate the goniasterid-like ophidiasterids (e.g. *Fromia*) from those with more cylindrical arms and small disks (e.g. *Linckia*).

No unambiguous ophidiasterid fossils exist that are comparable in morphology to those sampled for our tree. Identified ophidiasterid fossils demonstrate closer affinities with 'goniasterid-like' ophidiasterids (e.g. Blake & Reid, 1998) rather than those with small disks and long arms (e.g. *Linckia*). Further associations between molecular data and fossil occurrence will await additional clarification of ophidiasterid fossils.

#### THE PAXILLOSIDA, NOTOMYOTIDA, AND THE PSEUDARCHASTERINAE

The sister clade to the large, primary grouping of Valvatacea (node F in Fig. 1) includes a well-supported clade (node G) with taxa that have been previously included in the Paxillosida (Astropectinidae, Ctenodiscidae, Gonioplectinidae, Luidiidae), the monotypic Notomyotida (Benthopectinidae), and genera that have been included in the Pseudarchasterinae, a group that has historically been placed with the Goniasteridae (Valvatida). The overall taxonomic composition of this clade is very similar to the composition and subgroupings of the Archasteridae *sensu* Sladen (1889), which included primarily members of the Benthopectinidae and the Astropectinidae. The Pseudarchasterinae was recently reviewed by Blake & Jagt (2005) and included several fossil taxa in addition to *Pseudarchaster*, *Paragonaster*, *Perissogonaster*, and *Gephyreaster*. Pseudarchasterines were separated from other goniasterids by Blake (1987) but have been retained in the Goniasteridae, without distinction, in several recent accounts (e.g. Clark &



Downey, 1992; A.M. Clark, 1993). *Pseudarchaster* has been interpreted as being similar to certain goniasterid-like astropectinids, such as *Plutonaster* with which it shares several skeletal character similarities but differs in that most species of *Pseudarchaster* have nonpointed tube feet. Rowe & Gates (1995: 68) stopped short of moving *Pseudarchaster jordani* to the Paxillosida based on this single character. The addition of *Pseudarchaster* to this clade effectively isolates this body form to the Paxillosida. *Pseudarchaster* has been included in several other molecular phylogenies that have either (1) loosely supported affinities with other valvatidan taxa (e.g. Knott & Wray, 2000) or (2) been ambiguous (e.g. Janies, 2001).

The position of the Notomyotida (Benthopectinidae) as members of the same clade as the Paxillosida (node G in Fig. 1) is consistent with the phylogenies of Blake (1987) and Gale (1987b). Both supported the Notomyotida as the sister group to the larger, primary Valvatida clade. The remaining genera in the primary 'Paxillosida' clade (node I in Fig. 1) formed two subclades, one of which (node J) included several taxa with a marginal plate series that forms a distinctive periphery frequently with acute triangular arms bearing prominent spines (*Astropecten*, *Thrissacanthias*, *Bathybiaster*, *Persephonaster*, and *Psilaster*) versus those with more nondescript marginal plate series with smaller to absent spines (*Dipsacaster*, *Leptychaster*, *Mimasterella*, *Macroptychaster*, and *Luidia*). These morphological distinctions are reflected in several traditional identification keys and classifications (e.g. Fisher, 1911; Clark & Downey, 1992). The primary 'Paxillosida' clade includes *Luidia* supported as a derived lineage amongst the astropectinids (node K).

Historically, the Paxillosida has included a diverse assemblage of asteroids that occur on bottoms with unconsolidated sandy or muddy sediment. Because of this environmental constraint, this body form may be predisposed to being buried rapidly and is relatively well represented in the fossil record. Amongst the several 'paxillosid-like' forms observed in the fossil record are the Pseudarchasterinae, the Astropectinidae, the Luidiidae, the Ctenodiscidae, and the Radiasteridae. The Pseudarchasterinae has traditionally been classified as a subfamily of the Goniasteridae (in the Valvatida), but is here supported as a member of the Paxillosida.

*Pseudarchaster portlandicus* was described from the Jurassic of England by Blake (1986) and showed close affinities with living *Pseudarchaster*. Breton (1992) summarized and figured several *Pseudarchaster*-like Jurassic and Cretaceous taxa in the genus *Comptoniaster*. Based on our results, this suggests that these taxa maybe properly placed

within the Pseudarchasterinae in the Paxillosida rather than the Goniasteridae in the Valvatida. *Tethyaster* is living today (e.g. Clark & Clark, 1954) and is known from Jurassic fossils (Blake, 1986).

Cretaceous paxillosidans are relatively well represented in the fossil record. Fossil taxa close to *Mimastrella* include the Cretaceous *Betelgeusia* in the Radiasteridae, which was described by Blake & Reid (1998). Blake (1988a) described a Cretaceous ctenodiscid, *Paleoctenodiscus*, and identified the presence of cribiform organs in the fossil record. Gale (2005) described the Cretaceous *Chrispaulia* as the first fossil record of the Gonioplectinidae, represented in Figure 1 by *Goniopecten*. Villier, Breton & Atrops (2007) described *Prothrissacanthias* from the Cretaceous of Algeria, which they described as morphologically close to *Thrissacanthias* and *Persephonaster*, which are both included in Figure 1. Breton, Bilotte & Sigro (1995) described *Dipsacaster jadeti* from the Cretaceous of France. *Luidia* has been documented with a Miocene to Recent fossil occurrence (e.g. Blake, 1982) and it is likely to have diversified relatively recently. Its phylogenetic position does not disagree with the relative timing of its fossil occurrence.

Fossil material tentatively identified as *Cheiraster* has been identified from the Cretaceous by Blake & Jagt (2005) in addition to other fossils that have been described from the Cretaceous (Blake & Reid, 1998; Jagt, 2000). The Jurassic Paleobenthopectininae as described by Blake (1984) were reassigned by Villier *et al.* (2009) to the Velatida and are discussed elsewhere.

#### THE PAXILLOSIDA: PHYLOGENETIC PERSPECTIVES AND INSIGHT ON THE 'GREAT DEBATE'

The Paxillosida have occupied a prominent position in the discussions surrounding asteroid evolution and the early studies seeking out the 'primitive' asteroid ancestor. This discussion began with discussions between Mortensen (1922, 1923) and MacBride (1921, 1923) regarding the 'primitive' status of the Astropectinidae (Paxillosida) because of a number of morphological specializations, including, but not limited to pointed tube feet and the absence of a brachiolaria larvae. Mortensen argued for the primitiveness of the Astropectinidae whereas MacBride argued the opposite. Morphology-based phylogenies continued this discussion. Gale (1987b), following Mortensen, supported the Paxillosida as the basal sister taxon to the other living Asteroidea, whereas Blake (1987, 1988b) echoed MacBride, and supported the Paxillosida as having derived adaptations to living on a soft-bottom or unconsolidated, sediment type setting. Because of the focus on this argument, all subsequent phylogenetic studies have included paxillosidans, but most



have given ambiguous results. Many of these studies have not supported a monophyletic Paxillosida (e.g. Wada *et al.*, 1996; Knott & Wray, 2000; Matsubara *et al.*, 2004) and those that have, include relatively limited taxon sampling (e.g. Lafay *et al.*, 1995; Matsubara *et al.*, 2005; Yasuda *et al.*, 2006).

Although we do not have a definitive result supporting a basal lineage within the Asteroidea, our results do not place the Paxillosida as basal amongst the Valvatacea (following Mortensen, 1922, 123; Gale, 1987b) relative to our outgroup choice. The Paxillosida occur as derived relative to the Poraniidae and the clade containing the Ophidiasteridae + Mithrodiidae.

All of the included taxa on node G possess a 'Paxillosida' type morphology, which is associated with unconsolidated, soft-bottom substrate settings. All included taxa possess characters, such as the presence of paxillar abactinal and marginal plates, pointed tube feet and well-developed fasciolar grooves between the abactinal, marginal, and actinal plates, which imply a derived morphology (*sensu* MacBride, 1921, 1923 and later Blake, 1987, 1988b). It should be noted that our tree includes not only the Paxillosida *sensu* Blake (1987) but also the Notomyotida and the Pseudarchasterinae.

*Archaster* closely resembles *Astropecten* and possesses several similar morphological characteristics. *Archaster* was not included in our analysis because of a lack of histone H3 sequence data, but all prior studies from morphology (e.g. Blake, 1987) and molecules (Knott & Wray, 2000; Matsubara *et al.*, 2004) do not suggest that it shows any close relationship with the Paxillosida, suggesting that its *Astropecten*-like appearance is a result of convergence.

#### ANTARCTIC AND SUB-ANTARCTIC VALVATIDA

Two of the ingroup taxa, the Odontasteridae and the Ganeriidae, occur only in cold-water habitats, but occur primarily at high-latitudes in the Southern Hemisphere. Although isolated members occur in the deep-sea and the Arctic/boreal regions, both families demonstrate the greatest biodiversity and abundance in the Southern Ocean and adjacent regions.

Although sampling remains incomplete, taxa included in the analysis suggest possible patterns of diversification for these groups into Antarctic regions from the adjacent sub-Antarctic regions. We sampled a majority of the genera within the Odontasteridae (four out of six) and show (Fig. 1) that the New Zealand *Eurygonias* is the sister clade to a larger clade containing the Antarctic *Acodontaster*, the Antarctic (some deep-sea species) *Odontaster*, and the sub-Antarctic *Diplodontias* (southern tips of South Africa, South America, and New Zealand). Similarly,

the Antarctic *Perknaster* and *Cuenotaster* are supported on a single clade, which forms the sister to the sub-Antarctic *Cycethra*. Several other, more poorly sampled, clades, such as *Pergamaster* (Antarctic) and *Calliaster* (South-Central Pacific) plus *Milteliphaster* (South Pacific) and *Tosia* (temperate water Australia) and *Notioceramus* (Antarctic) place Antarctic lineages as the sister group to taxa occurring in adjacent regions. Additional specific sampling of these lineages is needed to test these relationships.

#### CONCLUSIONS

We present a comprehensively sampled, three-gene molecular phylogenetic review of the Valvatacea. Our tree has substantial implications for the classification of the most diverse group of modern Asteroidea, and suggests possible ancestry for Antarctic taxa. A full summary of differences between the historical classification and our results is shown in Table 2. Major conclusions include

1. The Solasteridae is removed from the Velatida and is supported within the Valvatida, which contains the Asterinidae, the Ganeriidae, and the Leilasteridae. *Cuenotaster*, which has historically been included in the Solasteridae, is supported herein with the Ganeriidae.
2. The Poraniidae is supported as sister taxa to the majority of valvataceans and is separated from prior hypotheses of close relationship with the Asteropseidae.
3. The Benthopectinidae (Notomyotida) and the Pseudarchasterinae are supported as sister taxa in a clade that includes the Goniopectinidae, the Ctenodiscidae, the Luidiidae, and the Astropectinidae, all within the Paxillosida.
4. Although traditional long-arm and small disk type Ophidiasteridae are supported, some goniasterid-like ophidiasterid forms are supported as members of the Goniasteridae. The traditional Ophidiasteridae is not supported as monophyletic.
5. Lineages with predominantly Antarctic members, such as the Odontasteridae and the Ganeriidae, are supported as having sister taxa that occur in adjacent regions, suggesting possible ancestry for these faunas.

#### ACKNOWLEDGEMENTS

We thank the following for their assistance with specimen assistance and providing tissues for DNA extraction: Kate Neil and Kareen Schnabel at the National Institute of Water and Atmospheric Research (Wellington, New Zealand); Bob VanSyoc and Chrissy Piotrowski at the California Academy of

**Table 2.** Revised list of valvatacean clades analysed in this study. Shaded lines indicate changes from historical classification. Family names are used here out of convenience. Bold face indicates those genera which are included with new families. A fully revised classification is in preparation.

## Valvatacea

Poraniidae: *Porania*, *Poraniopsis*

‘Ophidiasteridae’ clade:

Mithrodiidae: *Mithrodia*, *Thromidia*

Ophidiasteridae: *Leiaster*, *Linckia*, *Pharia*

## Paxillosida

Astropectinidae: *Astropecten*, *Bathybiaster*, *Dipsacaster*, *Leptychaster*, *Lonchotaster*, *Macroptychaster*, *Mimastrella*, *Persephonaster*, *Psilaster*, *Thrissacanthias*

Benthopectinidae: *Cheiraster*, *Nearchaster*

Ctenodiscidae: *Ctenodiscus*

Goniopectinidae: *Goniopecten*

Luidiidae: *Luidia*

Pseudarchasterinae: *Gephyreaster*, *Pseudarchaster* (from Goniasteridae)

## Valvatida

Asterinidae: NOT MONOPHYLETIC. *Anseropoda*, *Aquilonastra*, *Asterina*, *Callopatiria*, ***Dermasterias***, *Kampylaster*, ***Leilasteridae*** (*Leilaster*), *Meridiastra*, *Nepanthia*, *Paranepanthia*, *Parvulastra*, *Patiria*, *Patiriella*, ***Solasteridae***, *Stegnaster*, *Tremaster*

Ganeriidae: ***Cuenotaster*** (from Solasteridae), *Cycethra*, *Perknaster*, *Tarachaster*

Goniasteridae: (all bold from Ophidiasteridae) *Calliaster*, ***Celerina***, *Ceramaster*, *Cladaster*, *Cryptopeltaster*, ***Fromia***, *Hippasteria*, *Lithosoma*, *Mediaster*, *Milteliphaster*, ***Narcissia***, ***Neoferdina***, *Notioceramus*, *Nymphaster*, *Peltaster*, *Pergamaster*, *Rosaster*, *Sphaeriodiscus*, *Tosia*

Odontasteridae + Chaetasteridae clade: *Acodontaster*, *Chaetaster*, *Diplodontias*, *Eurygonias*, *Odontaster*

Oreasteridae clade: ***Acanthasteridae*** (*Acanthaster*), ***Asteropseidae*** (not monophyletic), ***Asteropsis***, *Culcita*, *Monachaster*, *Oreaster*, *Pentaceraster*, ***Petricia***, *Protoreaster*

Solasteridae: *Crossaster*, *Leilaster*, *Lophaster*, *Paralophaster*, *Solaster*

## Spinulosacea

## Velatida

Korethrasteridae: *Peribolaster*, *Remaster*

Myxasteridae: *Asthenactis*

Pterasteridae: *Euretaster*, *Hymenaster*

Sciences (San Francisco); Marc Eleaume and Nadia Ameziane at the Muséum National D'histoire Naturelle (Paris), Martha Nizinski and Cheryl Ames at the National Marine Fisheries Service (Washington DC), and Dave Pawson, Linda Ward, Jennifer Hammock, and Paul Greenhall at the US National Museum (Washington DC). Some of the 12S and 16S sequences were obtained with the help of Izoduwa O. Abbe, James W. Halk, Caitlyn Blanchard, and Cali Meyer. We thank Lauren VanThiel (US Antarctic Research Program), Loic Villier, Université de Provence, Marseille, France, Dan Blake, University of Illinois, Urbana-Champaign, and an anonymous reviewer for reading the manuscript and suggesting improvements. A Faculty Research Grant from the LSU Office of Research provided funding to D. Foltz. C. Mah was funded by OPP Antarctic postdoctoral fellowship (0631245) and USARP (ANT-0646308) contracts.

## REFERENCES

- Aziz A, Jangoux M. 1985.** On the status and affinities of the goniasterid genus *Calliaster* Gray, 1840. In: Keegan BF, O'Connor BDS, eds. *Proceedings of the 5<sup>th</sup> international echinoderm conference, Galway, 1984*. Balkema, Rotterdam, 585–586.
- Birkeland C. 1974.** Interactions between a sea pen and seven of its predators. *Ecological Monographs* **44**: 211–232.
- Blake DB. 1972.** Sea star *Platasterias*: ossicle morphology and taxonomic position. *Science* **176**: 306–307.
- Blake DB. 1979.** The affinities and origins of the crown-of-thorns sea star *Acanthaster* Gervais. *Journal of Natural History* **13**: 303–314.
- Blake DB. 1982.** Somasteroidea, Asteroidea, and the affinities of *Luidia* (*Platasterias*) *latiradiata*. *Palaeontology* **25**: 167–191.
- Blake DB. 1984.** The Benthopectinidae (Asteroidea: Echinodermata) of the Jurassic of Switzerland. *Eclogae Geologicae Helvetiae* **77**: 631–647.

- Blake DB. 1986.** Some new post-Paleozoic sea stars (Asteroidea: Echinodermata) and comments on taxon endurance. *Journal of Paleontology* **60**: 1103–1119.
- Blake DB. 1987.** A classification and phylogeny of post-Paleozoic sea stars (Asteroidea: Echinodermata). *Journal of Natural History* **21**: 481–528.
- Blake DB. 1988a.** A first fossil member of the Ctenodiscidae (Asteroidea, Echinodermata). *Journal of Paleontology* **62**: 626–631.
- Blake DB. 1988b.** Paxillosidans are not primitive asteroids: a hypothesis based on functional considerations. In: Burke RD, Mladenov PV, Lambert P, Parsley RL, eds. In *Echinoderm biology*. Rotterdam: Balkema, 309–314.
- Blake DB. 1990.** Adaptive zones of the class Asteroidea (Echinodermata). *Bulletin of Marine Science* **46**: 701–718.
- Blake DB. 1993.** A new asteroid genus from the Jurassic of England and its functional significance. *Palaeontology* **36**: 147–154.
- Blake DB, Jagt JWM. 2005.** New latest Cretaceous and earliest Paleogene asteroids (Echinodermata) from the Netherlands and Denmark and their palaeobiological significance. *Bulletin de l'Institut Royal des Sciences Naturelles de Belgique, Sciences de la Terre* **75**: 183–200.
- Blake DB, Reid R. 1998.** Some Albian (Cretaceous) asteroids (Echinodermata) from Texas and their paleobiological implications. *Journal of Paleontology* **72**: 512–532.
- Blake DB, Tintori A, Hagdorn H. 2000.** A new, early crown-group asteroid (Echinodermata) from the Norian (Triassic) of Northern Italy. *Rivista Italiana Di Paleontologia E Stratigrafia* **106**: 141–156.
- Bos AR, Gumanao GS, Alipoyo JCE, Cardona LT. 2008.** Population dynamics, reproduction and growth of the Indo-Pacific horned sea star, *Protoreaster nodosus*. *Marine Biology* **156**: 55–63.
- Breton G. 1992.** Les Goniasteridae (Asteroidea, Echinodermata) Jurassiques et crétaçés de France. Taphonomie, systématique, biostratigraphie, paléobiogéographie, évolution. *Bulletin Trimestriel de la Societe Geologique de Normandie et des Amis du Museum du Havre* **78**: 1–590.
- Breton G, Bilotte M, Sigro G. 1995.** *Dipsacaster jadeti* sp. nov., Astropectinidae (Asteroidea, Echinodermata) of the Maastrichtian from the Petites Pyrénées (France). *Bulletin Trimestriel de la Societe Geologique de Normandie et Amis du Museum du Havre* **82**: 35–42. (in French).
- Byrne M. 2006.** Life history diversity and evolution in the Asterinidae. *Integrative and Comparative Biology* **46**: 243–254.
- Byrne M, Cisternas P, Elia L, Relf B. 2005.** *Engrailed* is expressed in larval development and in the radial nervous system of *Patiriella* sea stars. *Development Genes and Evolution* **215**: 608–617.
- Castresana J. 2000.** Selection of conserved blocks from multiple alignments for their use in phylogenetic analysis. *Molecular Biology and Evolution* **17**: 540–552.
- Clark AM. 1983.** Notes on Atlantic and other Asteroidea. 3. The families Ganeriidae and Asterinidae, with description of a new asterinid genus. *Bulletin of the British Museum of Natural History* **45**: 359–380.
- Clark AM. 1984.** Notes on Atlantic and other Asteroidea. 4. Families Poraniidae and Asteropseidae. *Bulletin of the British Museum of (Natural History & Zoology)* **47**: 19–51.
- Clark AM. 1989.** An index of names of recent Asteroidea. Part 1: Paxillosida and Notomyotida. *Echinoderm Studies* **3**: 225–347.
- Clark AM. 1993.** An index of names of recent Asteroidea – Part 2: Valvatida. *Echinoderm Studies* **4**: 187–366.
- Clark AM. 1996.** An index of names of recent Asteroidea. Part 3: Velatida and Spinulosida. *Echinoderm Studies* **5**: 183–250.
- Clark AM, Clark AH. 1954.** A revision of the sea-stars of the genus *Tethyaster*. *Smithsonian Miscellaneous Collections* **122**: 1–27.
- Clark AM, Downey ME. 1992.** *Starfishes of the Atlantic*. New York: Chapman and Hall.
- Clark AM, Rowe FWE. 1971.** *Monograph of shallow-water Indo-West Pacific echinoderms*. Trustees of the British Museum (Natural History): London.
- Clark HL. 1946.** The echinoderm fauna of Australia: its composition and its origin. *Carnegie Institute of Washington Publication* **566**: 1–567.
- Fell HB. 1954.** New Zealand Fossil Asterozoa. 3. *Odontaster priscus* sp. nov. from the Jurassic. *Transactions of the Royal Society of New Zealand* **82**: 817–819.
- Fell HB. 1956.** New Zealand Fossil Asteroidea. 2. *Hippasteria antiqua* n. sp. from the Upper Cretaceous. *Records of the Canterbury Museum* **7**: 11–12.
- Fell HB. 1962a.** A surviving somasteroid from the Eastern Pacific Ocean. *Science* **136**: 633–636.
- Fell HB. 1962b.** A living somasteroid, *Platasterias latiradiata* Gray. *University of Kansas Paleontological Contributions* **6**: 1–16.
- Fisher WK. 1906.** The starfishes of the Hawaiian islands. *Bulletin of the U.S. Fisheries Commission* **23**: 987–1130.
- Fisher WK. 1911.** Asteroidea of the North Pacific and adjacent waters. 1. Phanerozoia and Spinulosida. *Bulletin of the United States National Museum* **76**: xiii + 420 pp, 122 pls.
- Fisher WK. 1919.** Starfishes of the Philippine seas and adjacent waters. *Bulletin of the United States National Museum* **100**: 1–712, 156 pls.
- Foltz DW. 2007.** An ancient repeat sequence in the ATP synthase  $\beta$ -subunit gene of forcipulate sea stars. *Journal of Molecular Evolution* **65**: 564–573.
- Foltz DW, Bolton MT, Kelley SP, Kelley DB, Nguyen AT. 2007.** Combined mitochondrial and nuclear sequences support the monophyly of forcipulatacean sea stars. *Molecular Phylogenetics and Evolution* **43**: 627–634.
- Foltz DW, Mah CL. 2009.** Recent relaxation of purifying selection on the tandem-repetitive early-stage histone H3 gene in brooding sea stars. *Marine Genomics* **2**: 113–118.
- Foltz DW, Mah CL. 2010.** Difference in larval type explains patterns of nonsynonymous substitutions in two ancient paralogs of the histone H3 gene in sea stars. *Evolution & Development* **12**: 220–228.
- Foltz DW, Nguyen AT, Kiger JR, Mah CL. 2008.** Pleistocene speciation of sister taxa in a North Pacific clade of brooding sea stars (*Leptasterias*). *Marine Biology* **154**: 593–602.



- Gale AS. 1987a.** Goniasteridae (Asteroidea, Echinodermata) from the Late Cretaceous of north-west Europe. 2. The genera *Calliderma*, *Crateraster*, *Nymphaster*, and *Chomataster*. *Mesozoic Research* **1**: 151–186.
- Gale AS. 1987b.** Phylogeny and classification of the Asteroidea (Echinodermata). *Zoological Journal of the Linnean Society* **89**: 107–132.
- Gale AS. 2005.** *Chrispaulia*, a new genus of mud star (Asteroidea, Gonioplectinidae) from the Cretaceous of England. *Geological Journal* **40**: 383–397.
- Hart DR. 2006.** Effects of sea stars and crabs on sea scallop *Placopecten magellanicus* recruitment in the Mid-Atlantic Bight (USA). *Marine Ecology Progress Series* **306**: 209–221.
- Hess H. 1970.** Schlangensterne und Seesterne aus dem oberen Hauterivien 'Pierre jaune' von St-Blaise bei Neuchâtel. *Eclogae Geologicae Helvetiae* **63**: 1069–1091.
- Hess H. 1972.** Eine Echinodermen-Fauna aus dem mittleren Dogger des Aargauer Juras. *Schweizerische Paläontologische Abhandlungen* **92**: 1–87.
- Hess H. 1981.** Ein neuer Seestern (*Mesotremaster zbindeni* n. sp.) und andere Echinodermen aus dem mittleren Oxford von Reuchenette (Bern Jura). *Eclogae Geologicae Helvetiae* **74/3**: 681–699.
- Hotchkiss FHC, Clark AM. 1976.** Restriction of the family Poraniidae *sensu* Spencer and Wright, 1966 (Echinodermata: Asteroidea). *Bulletin of the British Museum (Natural History)*, *Zoology* **30**: 263–268.
- Jagt J. 2000.** Late Cretaceous-Early Palaeogene echinoderms and the K/T boundary in the southeast Netherlands and northeast Belgium-Part 5: Asteroids. *Scripta Geologica* **121**: 377–503.
- Jangoux M. 1981.** Une nouvelle espèce d'astéride bathyale des eaux de Nouvelle-Calédonie (Echinodermata, Asteroidea). *Bulletin du Museum National D'Histoire Naturelle (Zoologie)* sect. A. **4**: 709–712.
- Jangoux M. 1982.** On *Tremaster* Verrill, 1879, an odd genus of Recent starfish (Echinodermata: Asteroidea). In: Lawrence JM, ed. *Echinoderms: proceedings of the international conference, Tampa Bay*. A.A. Balkema, Rotterdam, 155–163.
- Janies D. 2001.** Phylogenetic relationships of extant echinoderm classes. *Canadian Journal of Zoology* **79**: 1232–1250.
- Knott KE, Wray GA. 2000.** Controversy and consensus in asteroid systematics: new insights to ordinal and familial relationships. *American Zoologist* **40**: 382–392.
- Krieger KJ, Wing BL. 2002.** Megafauna associations with deepwater corals (*Prinnoa* spp.) in the Gulf of Alaska. *Hydrobiologia* **471**: 83–90.
- Lafay B, Smith AB, Christen R. 1995.** A combined morphological and molecular approach to the phylogeny of asteroids (Asteroidea: Echinodermata). *Systematic Biology* **44**: 190–208.
- MacBride EW. 1921.** Echinoderm larvae and their bearing on classification. *Nature* **108**: 529–530.
- MacBride EW. 1923.** Echinoderm larvae and their bearing on classification. *Nature* **111**: 47.
- Mah CL. 2006.** Phylogeny and biogeography of the deep-sea goniasterid, *Circeaster* (Echinodermata: Asteroidea) including descriptions of six new species. *Zoosystema* **28**: 917–954.
- Mah CL. 2007.** Systematics, Phylogeny, and Historical Biogeography of the *Pentagonaster* clade (Asteroidea, Valvatida, Goniasteridae). *Invertebrate Systematics* **21**: 311–339.
- Mah CL. 2009.** *World Asteroidea database*. Available at: <http://www.marinespecies.org/Asteroidea/aphia.php?p=taxdetails&id=123135>
- Mah CL, Nizinski M, Lundsten L. 2010.** Phylogenetic revision of the Hippasterinae (Goniasteridae, Asteroidea): systematics of Deep-Sea Corallivores, including one new genus and three new species. *Zoological Journal of the Linnean Society* **160**: 266–301.
- Malik HS, Henikoff S. 2003.** Phylogenomics of the nucleosome. *Nature Structural Biology* **10**: 882–891.
- Matsubara M, Komatsu M, Araki T, Asakawa S, Yokobori S, Watanabe K, Wada H. 2005.** The phylogenetic status of Paxillosida (Asteroidea) based on complete mitochondrial DNA sequences. *Molecular Phylogenetics and Evolution* **36**: 598–605.
- Matsubara M, Komatsu M, Wada H. 2004.** Close relationship between *Asterina* and Solasteridae (Asteroidea) supported by both nuclear and mitochondrial gene molecular phylogenies. *Zoological Science* **21**: 785–793.
- McClintock JB, Lawrence JM. 1985.** Characteristics of foraging in the soft-bottom benthic starfish *Luidia clathrata* (echinodermata: Asteroidea): prey selectivity, switching behavior, functional responses and movement patterns. *Oecologia* **66**: 291–298.
- Medina F-A, Del-Valle RA. 1983.** Un nuevo asteroideo Cretácico de la IslaVicecomodoro Marambio. *Contribucion Del Instituto Antartico Argentino* **286**: 1–7.
- Mortensen T. 1922.** Echinoderm larvae and their bearing on classification. *Nature* **110**: 806–807.
- Mortensen T. 1923.** Echinoderm larvae and their bearing on classification. *Nature* **111**: 322–323.
- O'Loughlin PM, Waters JM. 2004.** A molecular and morphological revision of genera of Asterinidae (Echinodermata: Asteroidea). *Memoirs of Museum Victoria* **61**: 1–40.
- Perrier E. 1884.** Mémoire sur les étoiles de mer recueillies dans la Mer des Antilles et la Golfe de Mexique. *Nouvelle Archives Museum d'Histoire Naturelle De Paris* **6**: 127–276.
- Perrier E. 1894.** *Stellérides. Expéditions scientifiques du Travailleur et du Talisman pendant les années 1880, 1881, 1882, 1883*, vol. 3. Paris: G. Masson, 1–431.
- Rowe FWE, Gates WE. 1995.** Echinodermata. In: Wells A, ed. *Zoological catalogue of Australia*, vol. 33. Melbourne: CSIRO, Australia, 1–510.
- Scheibling RE, Metaxas A. 2008.** Abundance, spatial distribution, and size structure of the sea star *Protoreaster nodosus* in Palau, with notes on feeding and reproduction. *Bulletin of Marine Science* **82**: 221–235.
- Sladen WP. 1889.** Report on the Asteroidea. *Report on the Scientific Results of the Voyage of H.M.S. Challenger during the years 1873–1876. Zoology* **30**: xlii + 893 pp, 118 pls.
- Smith AB, Peterson KJ, Wray G, Littlewood DTJ. 2004.** From bilateral symmetry to pentaradiality: the phylogeny of hemichordates and echinoderms. In: Cracraft J, Donoghue



- MJ, eds. *Assembling the tree of life*. New York: Oxford University Press, 365–383.
- Smith AB, Tranter TH. 1985.** *Protremaster*, a new Lower Jurassic genus of asteroid from Antarctica. *Geology Magazine* **122**: 351–359.
- Spencer WK, Wright CW. 1966.** Asterozoans. In: Moore RC, ed. *Treatise on invertebrate paleontology. Part U, Echinodermata* 3. Lawrence: University of Kansas Press, 4–107.
- Stamatakis A. 2006.** RAxML-VI-HPC: maximum likelihood-based phylogenetic analyses with thousands of taxa and mixed models. *Bioinformatics* **22**: 2688–2690.
- Thompson JD, Gibson TJ, Plewniak F, Jeanmougin F, Higgins DG. 1997.** The CLUSTAL-X windows interface: flexible strategies for multiple sequence alignment aided by quality analysis tools. *Nucleic Acids Research* **25**: 4876–4882.
- Villier L, Blake DB, Jagt WM, Kutscher M. 2004.** A preliminary phylogeny of the Pterasteridae (Echinodermata, Asteroidea) and the first fossil record: late Cretaceous of Germany and Belgium. *Paläontologische Zeitschrift* **78**: 281–299.
- Villier L, Breton G, Atrops F. 2007.** A new starfish (*Prothrissacanthias africanus* gen nov. sp. nov.) from the Berriasian of Algeria. *Revue De Paléobiologie, Genève* **26**: 413–424.
- Villier L, Charbonnier S, Riou B. 2009.** Sea stars from Middle Jurassic Lagerstätte of La Voulte-sur-Rhône (Ardeche, France). *Journal of Palaeontology* **83**: 389–398.
- Wada H, Komatsu H, Satoh N. 1996.** Mitochondrial rDNA phylogeny of the Asteroidea suggests the primitiveness of the Paxillosida. *Molecular Phylogenetics and Evolution* **6**: 97–106.
- Waters JM, O’Loughlin PM, Roy MS. 2004a.** Molecular systematics of some Indo-Pacific asterinids (Echinodermata, Asteroidea): does taxonomy reflect phylogeny? *Molecular Phylogenetics and Evolution* **30**: 872–878.
- Waters JM, O’Loughlin PM, Roy MS. 2004b.** Cladogenesis in a starfish species complex from southern Australia: evidence for vicariant speciation? *Molecular Phylogenetics and Evolution* **32**: 236–245.
- Yasuda N, Hamaguchi M, Sasaki M, Nagai S, Saba M, Nadaoka K. 2006.** Complete mitochondrial genome sequences for Crown-of-thorns starfish *Acanthaster planci* and *Acanthaster brevispinus*. *BMC Genomics* **7**: 17.

## Appendix 1

| Species                            | 12S      | 16S      | H3-early stage | Voucher         |
|------------------------------------|----------|----------|----------------|-----------------|
| <i>Acanthaster brevispinus</i> #   | AB231476 | AB231476 | –              | –               |
| <i>Acanthaster planci</i>          | AB084569 | AB231475 | –              | –               |
| <i>Acanthaster planci</i>          | –        | –        | GQ288607       | CASIZ 113560    |
| <i>Acodontaster hodgsoni</i>       | EU072963 | EU072933 | EU707685       | CASIZ 174598    |
| <i>Anseropoda antarctica</i>       | EU723018 | EU722940 | EU707722       | CASIZ 175766    |
| <i>Anseropoda aotearoa</i>         | EU723078 | EU722997 | EU707755       | NIWA 15416      |
| <i>Aquilonastra batheri</i> #      | AY370698 | AY370725 | –              | MV-MOL 247      |
| <i>Aquilonastra coronata</i> #     | AY370697 | AY370724 | –              | MV-MOL 246      |
| <i>Aquilonastra minor</i> #        | AY370696 | AY370723 | –              | MV-MOL 243      |
| <i>Aquilonastra yairi</i> #        | AY370709 | AY370737 | –              | –               |
| <i>Asterina gibbosa</i> #          | AY370700 | AY370726 | –              | MV-MOL 242      |
| <i>Asteropsis carinifera</i>       | EU072964 | EU072935 | EU707689       | CASIZ 117863    |
| <i>Asthenactis</i> sp.             | EU723034 | EU722957 | EU707746       | CASIZ 157505    |
| <i>Astropecten articulatus</i>     | DQ273741 | DQ297079 | DQ676901       | AMCC 113394     |
| <i>Bathybiaster loripes</i>        | EU072966 | EU072937 | EU707657       | CASIZ 162501    |
| <i>Calliaster elegans</i>          | EU723050 | EU722973 | EU707726       | MNHNP EcAh 4845 |
| <i>Callopatiria formosa</i>        | GQ288476 | GQ288521 | GQ288581       | CASIZ 102191    |
| <i>Celerina heffernani</i>         | EU723020 | EU722942 | EU707730       | CASIZ 113789    |
| <i>Ceramaster arcticus</i>         | EU723021 | EU722943 | EU707731       | CASIZ 143443    |
| <i>Ceramaster patagonicus</i>      | EU723035 | EU722958 | EU707732       | CASIZ 174590    |
| <i>Chaetaster moorei</i>           | EU072967 | EU072938 | EU707672       | CASIZ 118047    |
| <i>Cheiraster antarctica</i>       | EU072981 | EU072951 | EU707641       | CASIZ 169932    |
| <i>Cheiraster dawsoni</i>          | EU723028 | EU722950 | EU707736       | CASIZ 143965    |
| <i>Cladaster validus</i>           | EF624432 | EF624400 | EU707669       | CASIZ 158252    |
| <i>Crossaster borealis</i>         | GQ288502 | GQ288543 | GQ288589       | CASIZ 179002    |
| <i>Crossaster multispinus</i>      | GQ288468 | GQ288513 | GQ288567       | NIWA 27595      |
| <i>Crossaster papposus</i>         | DQ273725 | DQ297084 | DQ676904       | AMCC 113349     |
| <i>Cryptopeltaster lepidonotus</i> | GQ288486 | GQ288531 | GQ288580       | CASIZ 111828    |
| <i>Ctenodiscus crispatus</i>       | EU072969 | EU072940 | EU707696       | CASIZ 173281    |
| <i>Cuenotaster involutus</i>       | EU072970 | EU072941 | EU707671       | CASIZ 163086    |

Appendix 1 *Continued*

| Species                              | 12S      | 16S      | H3-early stage | Voucher                |
|--------------------------------------|----------|----------|----------------|------------------------|
| <i>Cuenotaster involutus</i>         | GQ288492 | GQ288553 | GQ288582       | CASIZ 176010           |
| <i>Culcita novaeguineae</i>          | EU072971 | EU072942 | EU0707688      | CASIZ 113508           |
| <i>Cycethra verrucosa</i>            | EU723017 | EU722939 | EU0707654      | –                      |
| <i>Dermasterias imbricata</i>        | –        | –        | DQ676906       | AMCC 113399            |
| <i>Dermasterias imbricata</i>        | AY370691 | AY370718 | –              | –                      |
| <i>Diplodontias dilatatus</i>        | DQ273732 | DQ297075 | DQ676898       | AMCC 113383            |
| <i>Diplodontias miliaris</i>         | DQ377827 | DQ297078 | DQ676900       | AMCC113392             |
| <i>Diplodontias singularis</i>       | EU723016 | EU722938 | EU0707653      | –                      |
| <i>Dipsacaster borealis</i>          | EU723037 | EU722960 | EU0707738      | CASIZ 143420           |
| <i>Euretaster insignis</i>           | EU072974 | EU072944 | EU0707691      | CASIZ 104210           |
| <i>Eurygonias hylacanthus</i>        | DQ273739 | DQ297089 | DQ676908       | AMCC 114324            |
| <i>Fromia monilis</i>                | EU072975 | EU072945 | EU0707692      | CASIZ 107520           |
| <i>Gephyreaster swifti</i>           | EU072976 | EU072946 | EU0707690      | CASIZ 158251           |
| <i>Gilbertaster anacanthus</i>       | GQ288478 | GQ288523 | GQ288568       | CASIZ 159080           |
| <i>Gilbertaster caribbeae</i>        | GQ288485 | GQ288530 | GQ288604       | USNM 1126238           |
| <i>Goniopecten demonstrans</i>       | GQ288507 | GQ288539 | GQ288605       | –                      |
| <i>Hippasteria spinosa</i>           | EU723022 | EU722944 | EU0707728      | CASIZ 163253           |
| <i>Hippasteria spinosa</i>           | GQ288482 | GQ288525 | GQ288576       | CASIZ 163250           |
| <i>Hymenaster latebrosus</i>         | EU072978 | EU072948 | EU0707670      | CASIZ 163076           |
| <i>Kampylaster incurvatus</i>        | GQ288477 | GQ288522 | GQ288571       | CASIZ 167617           |
| <i>Leiaster glaber</i>               | EU723023 | EU722945 | EU0707748      | CASIZ 104486           |
| <i>Leilaster</i> sp.                 | GQ288469 | GQ288514 | GQ288565       | MNHNP EcAs 12610       |
| <i>Leptychaster propinquus</i>       | EU723039 | EU722962 | EU0707739      | CASIZ 158249           |
| <i>Linckia nodosa</i>                | EU723024 | EU722946 | EU0707734      | CASIZ 112840           |
| <i>Lithosoma novazelandiae</i>       | EU723068 | EU722989 | EU0707749      | NIWA 15423             |
| <i>Lonchotaster tartareus</i>        | EU072979 | EU072949 | EU0707660      | CASIZ 163084           |
| <i>Lophaster densus</i>              | EU072980 | EU072950 | EU0707665      | CASIZ 163121           |
| <i>Lophaster furcilliger</i>         | GQ288475 | GQ288520 | GQ288572       | CASIZ 137853           |
| <i>Lophaster furcilliger</i>         | GQ288504 | GQ288550 | GQ288592       | CASIZ 178987           |
| <i>Luidia clathrata</i>              | DQ273743 | DQ297096 | DQ676913       | AMCC 113393            |
| <i>Luidia foliolata</i>              | EU072982 | EU072952 | EU0707697      | CASIZ 105625           |
| <i>Macrotychaster accrescens</i>     | DQ273742 | DQ297098 | DQ676915       | AMCC 113410            |
| <i>Mediaster aequalis</i>            | EU723013 | EU072953 | EU0707662      | CASIZ 120090           |
| <i>Mediaster bairdi</i>              | GQ288489 | GQ288535 | GQ288601       | USNM 1127106           |
| <i>Mediaster ornatus</i>             | EU723047 | EU722970 | GQ288562       | CASIZ 157499           |
| <i>Mediaster sladeni</i>             | EU723069 | EU722990 | EU0707751      | NIWA 27627             |
| <i>Mediaster tenellus</i>            | GQ288488 | GQ288534 | GQ288594       | CASIZ 178975           |
| <i>Meridiastra atyphoida</i> #       | AY370716 | AY370742 | –              | MV-MOL 185             |
| <i>Meridiastra calcar</i>            | AY370702 | AY370728 | –              | Australian Mus. J21954 |
| <i>Meridiastra fissura</i> #         | AY370714 | AY370740 | –              | MV-MOL 187             |
| <i>Meridiastra gunnii</i> #          | AY370701 | AY370727 | –              | MV-MOL 54              |
| <i>Meridiastra mortenseni</i> #      | AY370707 | AY370735 | –              | MV-F89163              |
| <i>Meridiastra nigranota</i> #       | AY370715 | AY370741 | –              | MV-MOL 8               |
| <i>Meridiastra oriens</i> #          | AY370704 | AY370730 | –              | MV-MOL 175             |
| <i>Milteliphaster wanganellensis</i> | EU723025 | EU722947 | EU0707725      | CASIZ 108646           |
| <i>Mimastrella cognata</i>           | EU723005 | EU722928 | EU0707655      | –                      |
| <i>Mithrodia clavigera</i>           | EU072983 | EU072954 | EU0707699      | CASIZ 115525           |
| <i>Monachaster sanderi</i>           | EU723026 | EU722948 | EU0707733      | CASIZ 173553           |
| <i>Narcissia trigonaria</i>          | GQ288490 | GQ288537 | GQ288603       | USNM 1127111           |
| <i>Nearchaster variabilis</i>        | GQ288495 | GQ288538 | GQ288595       | CASIZ 178988           |
| <i>Neoferdina cumingi</i>            | EU723029 | EU722951 | EU0707729      | CASIZ 113512           |
| <i>Nepanthia grangei</i>             | EU723079 | EU722998 | EU0707753      | NIWA 15417             |
| <i>Notioceramus anomalus</i>         | GQ288481 | GQ288527 | GQ288577       | CASIZ 176007           |
| <i>Nymphaster arenatus</i>           | GQ288484 | GQ288526 | GQ288579       | CASIZ 112827           |

Appendix 1 *Continued*

| Species                              | 12S      | 16S      | H3-early stage | Voucher          |
|--------------------------------------|----------|----------|----------------|------------------|
| <i>Odontaster meridionalis</i>       | DQ273730 | DQ297100 | DQ676917       | AMCC 113406      |
| <i>Odontaster penicillatus</i>       | EU723001 | EU722926 | EU707656       | –                |
| <i>Odontaster validus</i>            | EF624444 | EF624414 | EU707663       | CASIZ 169926     |
| <i>Oreaster reticulatus</i>          | GQ288470 | GQ288515 | GQ288570       | USNM 1135008     |
| <i>Paralophaster antarcticus</i>     | GQ288506 | GQ288552 | GQ288588       | CASIZ 174645     |
| <i>Paralophaster godfroyi</i>        | GQ288505 | GQ288551 | GQ288587       | CASIZ 176011     |
| <i>Paralophaster lorioli</i>         | EU723058 | EU722979 | GQ288563       | CASIZ 167622     |
| <i>Paranepanthia aucklandensis</i> # | AY370708 | AY370736 | –              | –                |
| <i>Paranepanthia grandis</i> #       | AY370713 | AY370739 | –              | MV-MOL 178       |
| <i>Paranepanthia</i> sp.             | GQ288471 | GQ288516 | GQ288566       | MNHNP EcAs 12508 |
| <i>Paranepanthia</i> sp. JMW-2003#   | AY370693 | AY370720 | –              | –                |
| <i>Parvulastra calcarata</i> #       | AY370712 | AY370738 | –              | MV-MOL 249       |
| <i>Parvulastra exigua</i> #          | AY370703 | AY370729 | –              | –                |
| <i>Parvulastra vivipara</i> #        | AY370705 | AY370733 | –              | –                |
| <i>Patiria chilensis</i> #           | AY370694 | AY370721 | –              | MV-MOL 240       |
| <i>Patiria miniata</i>               | –        | DQ297074 | DQ676897       | AMCC 113402      |
| <i>Patiria miniata</i>               | DQ273727 | –        | –              | AMCC 113382      |
| <i>Patiria miniata</i> #             | AY370695 | AY370722 | –              | –                |
| <i>Patiria pectinifera</i> #         | D16387   | D16387   | –              | –                |
| <i>Patiriella dyscrita</i>           | GQ288473 | GQ288518 | GQ288574       | CASIZ 118456     |
| <i>Patiriella exigua</i>             | EU723040 | EU722963 | EU707724       | CASIZ 117900     |
| <i>Patiriella regularis</i>          | DQ273733 | –        | DQ676925       | AMCC 113390      |
| <i>Patiriella regularis</i>          | –        | AY370734 | –              | –                |
| <i>Patiriella regularis</i> #        | AY370706 | AY370734 | –              | –                |
| <i>Peltaster micropeltus</i>         | EU723030 | EU722953 | EU707727       | CASIZ 171710     |
| <i>Pentacreraster cumingi</i> #      | EU723031 | EU722954 | –              | CASIZ 109407     |
| <i>Pergamaster incertus</i>          | GQ288483 | GQ288529 | GQ288578       | CASIZ 163059     |
| <i>Peribolaster folliculatus</i>     | EU072984 | EU072955 | EU707668       | CASIZ 163123     |
| <i>Perknaster aurantiacus</i>        | GQ288493 | GQ288554 | GQ288585       | CASIZ 174670     |
| <i>Perknaster charcoti</i>           | EU072985 | EU072956 | EU707686       | CASIZ 163085     |
| <i>Perknaster densus</i>             | GQ288494 | GQ288555 | GQ288586       | CASIZ 174651     |
| <i>Persephonaster patagiatus</i>     | EU723006 | EU722937 | EU707650       | CASIZ 116778     |
| <i>Petricia vernicina</i>            | EU723077 | EU722996 | EU707757       | NIWA 2768        |
| <i>Pharia pyramidata</i>             | EU723033 | EU722956 | EU707759       | CASIZ 163788     |
| <i>Porania antarctica</i>            | EU072986 | EF624418 | EU707663       | CASIZ 167616     |
| <i>Porania pulvillus</i>             | EU722999 | EU722924 | EU707658       | USNM 1127105     |
| <i>Poraniopsis echinaster</i>        | EU723000 | EU722923 | EU707652       | –                |
| <i>Poraniopsis inflata</i>           | EU723041 | EU722964 | EU707741       | CASIZ 120150     |
| <i>Protoreaster nodosus</i>          | GQ288472 | GQ288517 | GQ288569       | USNM1135007      |
| <i>Pseudarchaster parelli</i>        | EU723042 | EU722965 | EU707737       | CASIZ 120380     |
| <i>Psilaster cassiope</i>            | GQ288511 | GQ288540 | GQ288600       | CASIZ 178991     |
| <i>Remaster gourdoni</i>             | EU072987 | EU072957 | EU707667       | CASIZ 167615     |
| <i>Rosaster mimicus</i>              | EU723059 | EU722980 | EU707750       | NIWA 15432       |
| <i>Solaster caribbaeus</i>           | GQ288501 | GQ288549 | GQ288602       | USNM 1127108     |
| <i>Solaster dawsoni</i>              | GQ288474 | GQ288519 | GQ288573       | CASIZ 119165     |
| <i>Solaster hypothrissus</i>         | GQ288496 | GQ288546 | GQ288584       | CASIZ 163958     |
| <i>Solaster notophrynus</i>          | GQ288499 | GQ288545 | GQ288583       | CASIZ 163147     |
| <i>Solaster paxillatus</i>           | GQ288497 | GQ288547 | GQ288590       | CASIZ 164100     |
| <i>Solaster paxillatus</i> #         | GQ288498 | GQ288548 | –              | CASIZ 143959     |
| <i>Solaster regularis</i>            | GQ288503 | GQ288544 | GQ288591       | CASIZ 174602     |
| <i>Solaster stimpsoni</i>            | DQ273726 | DQ297113 | DQ676930       | AMCC 113400      |
| <i>Solaster tropicus</i>             | GQ288500 | GQ288542 | GQ288593       | CASIZ 104211     |
| <i>Sphaeriodiscus mirabilis</i>      | GQ288487 | GQ288533 | GQ288606       | CASIZ 174584     |
| <i>Stegnaster inflatus</i>           | EU723076 | EU722995 | EU707756       | –                |

Appendix 1 *Continued*

| Species                             | 12S      | 16S      | H3-early stage | Voucher         |
|-------------------------------------|----------|----------|----------------|-----------------|
| <i>Stegnaster inflatus</i> #        | AY370692 | AY370719 | –              | MV-MOL 241      |
| <i>Tarachaster australis</i>        | EU723061 | EU722983 | EU707754       | NIWA 15419      |
| <i>Thrissacanthias penicillatus</i> | EU723045 | EU722968 | EU707740       | CASIZ 115075    |
| <i>Thromidia catalai</i>            | EU072989 | EU072959 | EU707698       | CASIZ 107266    |
| <i>Tosia australis</i>              | EU072990 | EU072960 | EU707693       | USNM 1135012    |
| <i>Tremaster mirabilis</i> #        | EU723046 | EU722969 | –              | CASIZ 174624    |
| <i>Tremaster mirabilis</i> #        | EU723049 | EU722972 | –              | MNHNP EcAh 5133 |
| <i>Tremaster mirabilis</i> #        | GQ288479 | GQ288524 | –              | CASIZ 112822    |

#These sequences were analyzed only in Fig. 2.

## Appendix 2 PCR and sequencing primers used in the present study

| Primer   | Sequence (5'→3')           | Location* | Reference¶                           |
|----------|----------------------------|-----------|--------------------------------------|
| AST-12SL | CTTAATGACAAAGCAAAGCACTGA   | 5940-5964 | Waters <i>et al.</i> (2004a)         |
| 12SF#    | GGTHAATTATGTGCCAGCCACCG    | 6232-6254 | this study                           |
| 12SN#    | TTAAAAC TCAAAGRACTTGCGGT   | 6484-6507 | Foltz <i>et al.</i> (2007)           |
| A12S#    | CARCNTGTATACCATCRTCGTCAG   | 6581-6604 | Foltz <i>et al.</i> (2007)           |
| 12SA#    | ACACATCGCCCGTCACTCTC       | 6818-6837 | Smith <i>et al.</i> (1993)           |
| AST-12SR | AACCTCCTTCCTTTAATTTACAAGA  | 7025-7001 | Waters <i>et al.</i> (2004a)         |
| WadaB    | CCGGTITGAACTCAGATCAIGT     | 7637-7658 | Wada <i>et al.</i> (1996, modified)  |
| AST16SL2 | CGTAGGATTTTAATGGTTCGAACAGA | 7656-7680 | Waters <i>et al.</i> (2004b)         |
| Alt16S#  | AAARGAAIAAGTTACCRYAGGGATAA | 7804-7779 | Foltz <i>et al.</i> (2007)           |
| 16SB#    | ACGAGAAGACCCTITIGAGCTT     | 8047-8026 | Smith <i>et al.</i> (1993, modified) |
| WadaA#   | CGCCTGTTTTIICAAAAACAT      | 8275-8256 | Wada <i>et al.</i> (1996, modified)  |
| 16SF#    | AAAAAGTAGGATTAATAGCATC     | 8437-8415 | this study                           |
| AST16SR2 | TGTGAAGGAAAGTTGAAATAATGTG  | 8879-8858 | Waters <i>et al.</i> (2004b)         |

\*In the *Patiria pectinifera* complete mtDNA sequence (D16387).

#These were generally used as both forward and reverse (complementary) primers.

¶See article for references, except Smith *et al.* (1993) is from *J. Mol. Evol.* **36**: 545–554.
